# Supplementary material
Source: Royal Society of Chemistry journal article supplement (doi:10.1039/d6ta02179d)
Supplement: d6ta02179d1.pdf [file d6ta02179d1.pdf]

## **Supporting Information**

**Dynamic Confinement of Cu<sub>3</sub> Clusters in  
T-C<sub>3</sub>N<sub>2</sub> Pores: An Adaptive Interface for  
Selective CO Electroreduction to C<sub>3</sub> Products**

## List of Figures and Tables

|                                                                                                                                                                                                                                                                                                                                                                                                                                                       |    |
|-------------------------------------------------------------------------------------------------------------------------------------------------------------------------------------------------------------------------------------------------------------------------------------------------------------------------------------------------------------------------------------------------------------------------------------------------------|----|
| Figure S1 Comparison of the structures and unit cell parameters, Cu–Cu bond lengths, Cu–N bond lengths, and binding energies of Cu <sub>3</sub> with the substrates for Cu <sub>3</sub> @g-C <sub>3</sub> N <sub>4</sub> , Cu <sub>3</sub> @g-C <sub>4</sub> N <sub>3</sub> , Cu <sub>3</sub> @g-CN, Cu <sub>3</sub> @C <sub>2</sub> N, Cu <sub>3</sub> @C <sub>9</sub> N <sub>4</sub> , and Cu <sub>3</sub> @T-C <sub>3</sub> N <sub>2</sub> . ..... | 3  |
| Figure S2 (a-d) The optimized structures of Cu <sub>n</sub> @T-C <sub>3</sub> N <sub>2</sub> (n = 1-4) and (e) the interaction energy between Cu clusters and the substrate .....                                                                                                                                                                                                                                                                     | 4  |
| Figure S3 Kinetic energy barriers ( <i>G</i> <sub>b</sub> ), Gibbs free energy changes ( $\Delta G$ ), and the main C-C bond lengths for the formation of *COCOCO from different configurations of CO coupling. ....                                                                                                                                                                                                                                  | 5  |
| Figure S4 Kinetic energy barrier ( <i>G</i> <sub>b</sub> ), the change in Gibbs free energy ( $\Delta G$ ) of the 3*CO coupling reaction on the Cu(111) surface to form *COCOCO, as well as the main C-C bond length. ....                                                                                                                                                                                                                            | 6  |
| Figure S5 PDOS of (a) Cu(111), (b) Cu(111) catalyst with three adjacent CO molecules, as well as the d-band center of the Cu site; (c) ICOHP analysis of the C-O bond and Cu-C bond; (d) Charge difference density map of CO adsorption, with the interface value being 0.002 e/Å <sup>3</sup> . ....                                                                                                                                                 | 7  |
| Figure S6 Gibbs free energy diagram and intermediate structures for the lowest energy pathway of CO reduction to C <sub>1</sub> products.....                                                                                                                                                                                                                                                                                                         | 8  |
| Figure S7 Gibbs free energy diagram and intermediate structures for the lowest energy pathway of CO reduction to C <sub>2</sub> products.....                                                                                                                                                                                                                                                                                                         | 9  |
| Table S1 Changes in Cu-Cu, Cu-N bond lengths, the distances between the three Cu sites and the T-C <sub>3</sub> N <sub>2</sub> sheet, and the CO adsorption energy (eV/CO) during continuous CO adsorption. ....                                                                                                                                                                                                                                      | 10 |
| Table S2 Changes in Cu-Cu, Cu-N bond lengths, and the distances between the three Cu sites and the T-C <sub>3</sub> N <sub>2</sub> sheet during the C-C coupling process. ....                                                                                                                                                                                                                                                                        | 11 |

|                                                                                                                                                                                                  |    |
|--------------------------------------------------------------------------------------------------------------------------------------------------------------------------------------------------|----|
| Table S3 The reaction path for the formation of the C <sub>3</sub> product of the Cu <sub>3</sub> @T-C <sub>3</sub> N <sub>2</sub> catalyst and the relative free energy ( $\Delta G/eV$ ) ..... | 12 |
| Table S4 Cu-Cu, Cu-N bond lengths, and the distances between the three Cu sites and the T-C <sub>3</sub> N <sub>2</sub> sheet during the progress for C <sub>3</sub> products.....               | 13 |
| Table S5 The reaction path for the formation of the C <sub>1</sub> product of the Cu <sub>3</sub> @T-C <sub>3</sub> N <sub>2</sub> catalyst and the relative free energy ( $\Delta G/eV$ ) ..... | 14 |
| Table S6 The reaction path for the formation of the C <sub>2</sub> product of the Cu <sub>3</sub> @T-C <sub>3</sub> N <sub>2</sub> catalyst and the relative free energy ( $\Delta G/eV$ ) ..... | 15 |
| Table S7 Optimized energy and CONTCAR .....,,,.....                                                                                                                                              | 17 |

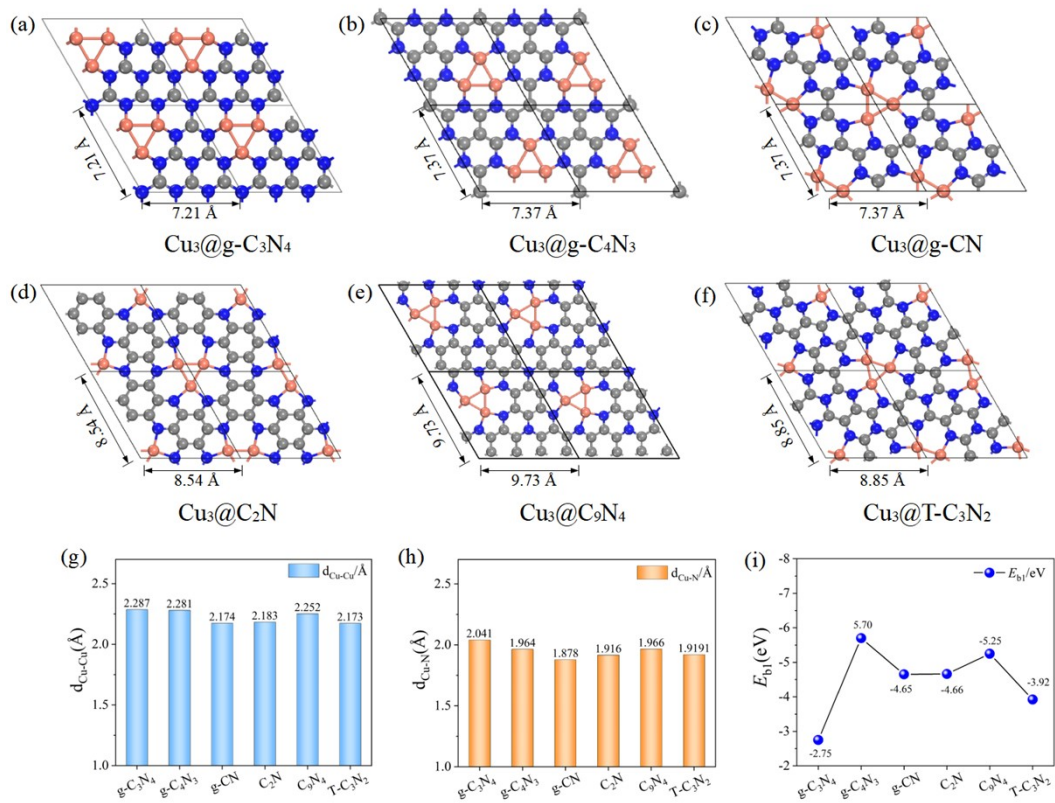

Figure S1 Comparison of the structures and unit cell parameters, Cu–Cu bond lengths, Cu–N bond lengths, and binding energies of Cu<sub>3</sub> with the substrates for Cu<sub>3</sub>@g-C<sub>3</sub>N<sub>4</sub>, Cu<sub>3</sub>@g-C<sub>4</sub>N<sub>3</sub>, Cu<sub>3</sub>@g-CN, Cu<sub>3</sub>@C<sub>2</sub>N, Cu<sub>3</sub>@C<sub>9</sub>N<sub>4</sub>, and Cu<sub>3</sub>@T-C<sub>3</sub>N<sub>2</sub>.

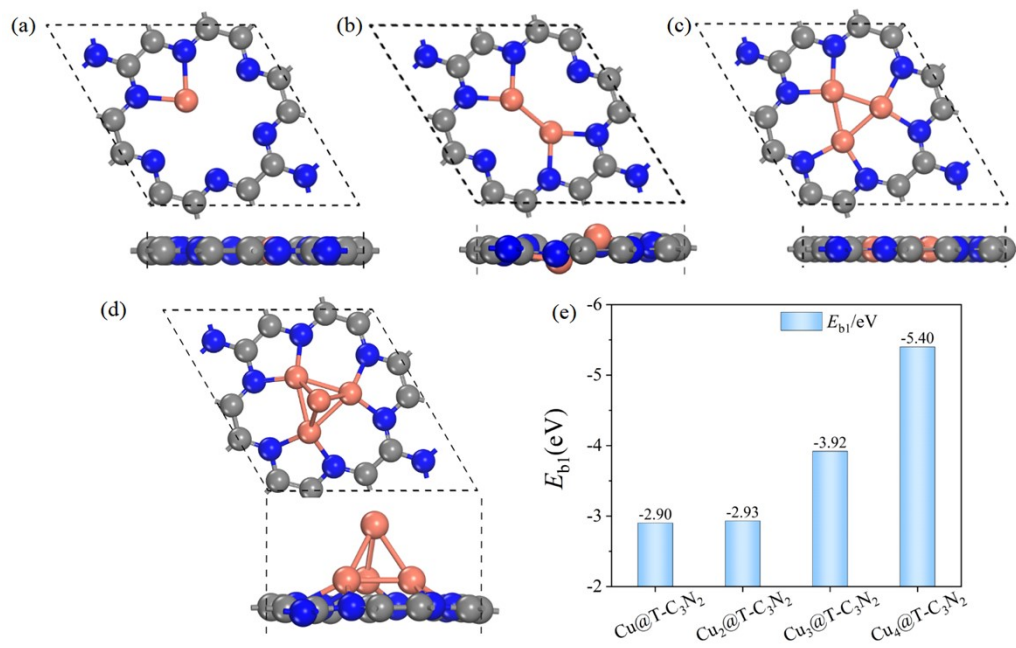

Figure S2 (a-d) The optimized structures of Cu<sub>n</sub>@T-C<sub>3</sub>N<sub>2</sub> (n = 1-4) and (e) the interaction energy ( $E_{b1}$ ) between Cu clusters and the substrate

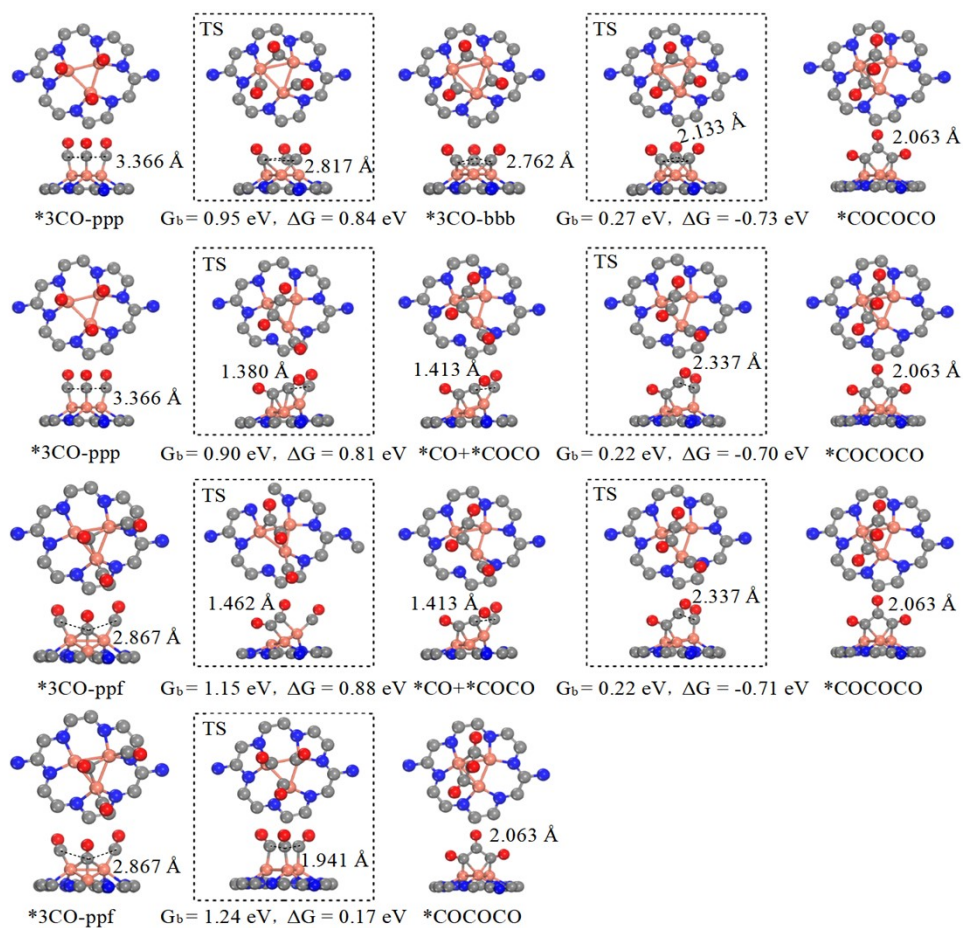

Figure S3 Kinetic energy barriers ( $G_b$ ), Gibbs free energy changes ( $\Delta G$ ), and the main C-C bond lengths for the formation of \*COCOCO from different configurations of CO coupling.

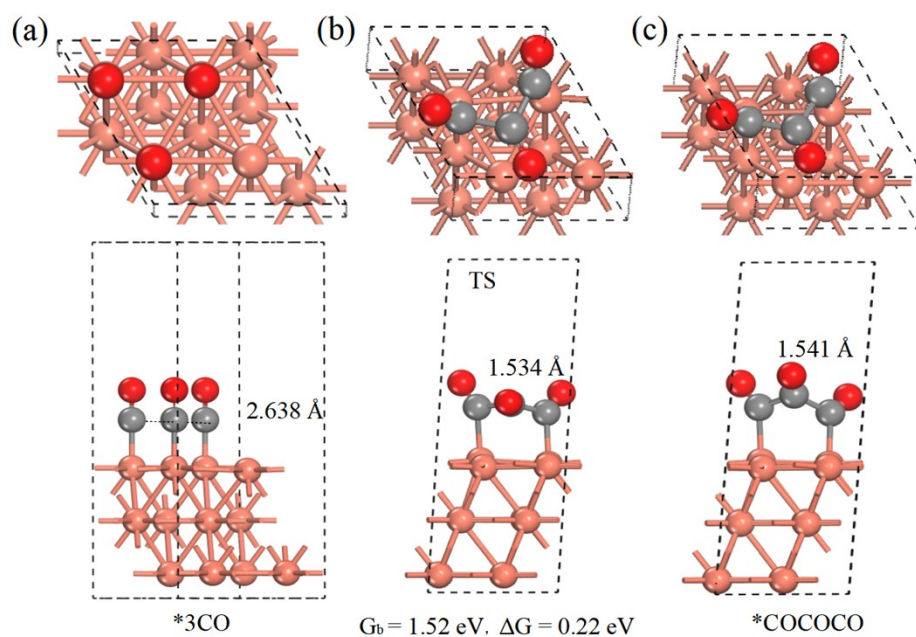

Figure S4 Kinetic energy barrier ( $G_b$ ), the change in Gibbs free energy ( $\Delta G$ ) of the  $3*CO$  coupling reaction on the Cu(111) surface to form  $*\text{COCOCO}$ , as well as the main C-C bond length.

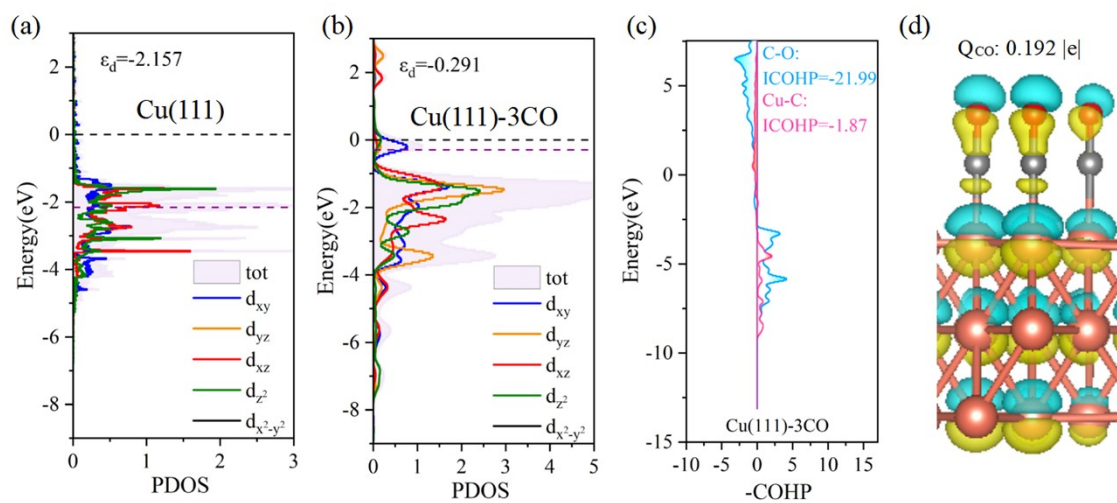

Figure S5 PDOS of (a) Cu(111), (b) Cu(111) catalyst with three adjacent CO molecules, as well as the d-band center of the Cu site ( $\epsilon_d$ ); (c) ICOHP analysis of the C-O bond and Cu-C bond; (d) Charge difference density map of CO adsorption, with the interface value being  $0.002 \text{ e}/\text{\AA}^3$ .

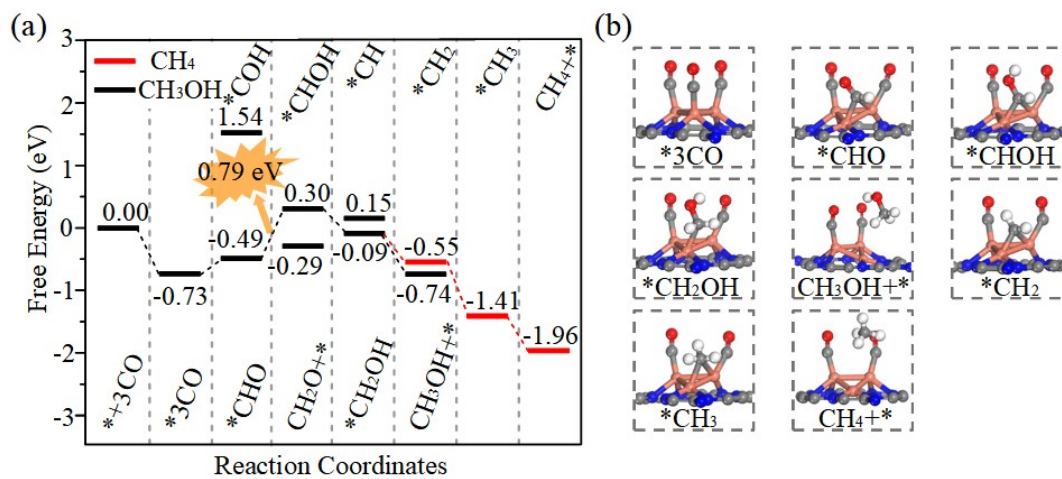

Figure S6 Gibbs free energy diagram and intermediate structures for the lowest energy pathway of CO reduction to C<sub>1</sub> products.

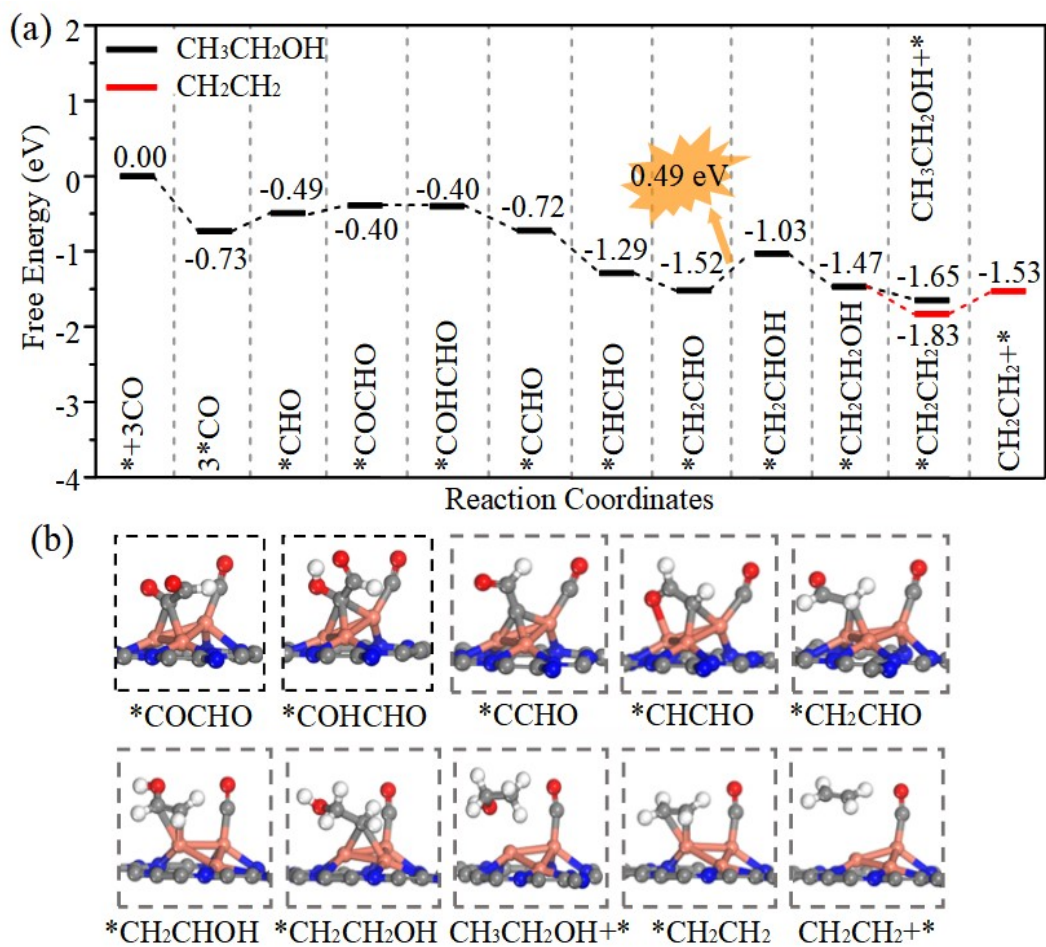

Figure S7 Gibbs free energy diagram and intermediate structures for the lowest energy pathway of CO reduction to C<sub>2</sub> products.

Table S1 Changes in Cu-Cu, Cu-N bond lengths, the distances between the three Cu sites and the T-C<sub>3</sub>N<sub>2</sub> sheet, and the CO adsorption energy (eV/CO) during continuous CO adsorption.

| Pathway 1             |         |        |                     |                     |                     |                      |
|-----------------------|---------|--------|---------------------|---------------------|---------------------|----------------------|
|                       | Cu-Cu/Å | Cu-N/Å | h <sub>Cu1</sub> /Å | h <sub>Cu2</sub> /Å | h <sub>Cu3</sub> /Å | E <sub>ads</sub> /eV |
| *+3CO                 | 2.1730  | 1.9191 | 0                   | 0                   | 0                   |                      |
| *CO-p+2CO             | 2.2405  | 2.0704 | 0.5362              | 1.2922              | 0.6369              | -0.44                |
| *2CO-pp+CO            | 2.3785  | 2.1713 | 0.4594              | 1.3405              | 1.3394              | -0.39                |
| *3CO-ppp <sup>a</sup> | 2.4926  | 2.1189 | 1.3582              | 1.3574              | 1.3506              | -0.24                |
| Pathway 2             |         |        |                     |                     |                     |                      |
|                       | Cu-Cu/Å | Cu-N/Å | h <sub>Cu1</sub> /Å | h <sub>Cu2</sub> /Å | h <sub>Cu3</sub> /Å | E <sub>ads</sub> /eV |
| *+3CO                 | 2.1730  | 1.9191 | 0                   | 0                   | 0                   |                      |
| *CO-f+2CO             | 2.3447  | 1.9646 | 0.9293              | 0.8625              | 0.8659              | -1.41                |
| *2CO-pf+CO            | 2.5120  | 2.0180 | 0.7753              | 1.4604              | 0.7909              | -0.64                |
| *3CO-ppf              | 2.4870  | 2.1497 | 0.5376              | 1.4206              | 1.3926              | -0.27                |

<sup>a</sup> The p represents a point position, b represents a bridge position, and f represents a face position.

Table S2 Changes in Cu-Cu, Cu-N bond lengths, and the distances between the three Cu sites and the T-C<sub>3</sub>N<sub>2</sub> sheet during the C-C coupling process.

|                       | Cu-Cu/Å | Cu-N/Å | h <sub>Cu1</sub> /Å | h <sub>Cu2</sub> /Å | h <sub>Cu3</sub> /Å |
|-----------------------|---------|--------|---------------------|---------------------|---------------------|
| 3*CO-ppp <sup>a</sup> | 2.4926  | 2.1189 | 1.3582              | 1.3574              | 1.3506              |
| TS1                   | 2.6193  | 2.0887 | 1.3345              | 1.3282              | 1.3305              |
| 3*CO-bbb              | 2.6735  | 2.0402 | 1.3220              | 1.3224              | 1.3222              |
| TS2                   | 2.5297  | 2.0634 | 1.2645              | 1.2150              | 1.2499              |
| *COCOCO               | 2.3965  | 2.0538 | 1.2282              | 1.0854              | 1.0478              |
| 3*CO-ppp              | 2.4926  | 2.1189 | 1.3582              | 1.3574              | 1.3506              |
| TS1                   | 2.3202  | 2.0618 | 0.9000              | 1.5985              | 0.9452              |
| *COCO+*CO             | 2.2887  | 2.0710 | 0.8671              | 1.6442              | 0.8515              |
| TS2                   | 2.3306  | 2.0926 | 1.0020              | 1.3563              | 0.9894              |
| *COCOCO               | 2.3965  | 2.0538 | 1.2282              | 1.0854              | 1.0478              |
| 3*CO-ppf              | 2.4870  | 2.1497 | 0.5376              | 1.4206              | 1.3926              |
| TS1                   | 2.3375  | 2.1756 | 1.0749              | 1.7747              | 0.8207              |
| *COCO+*CO             | 2.2887  | 2.0710 | 0.8671              | 1.6442              | 0.8515              |
| TS2                   | 2.3306  | 2.0926 | 1.0020              | 1.3563              | 0.9894              |
| *COCOCO               | 2.3965  | 2.0538 | 1.2282              | 1.0854              | 1.0478              |
| 3*CO-ppf              | 2.4870  | 2.1497 | 0.5376              | 1.4206              | 1.3926              |
| TS                    | 2.5099  | 2.0841 | 1.1979              | 1.2626              | 1.2197              |
| *COCOCO               | 2.3965  | 2.0538 | 1.2282              | 1.0854              | 1.0478              |

<sup>a</sup> The p represents a point position, b represents a bridge position, and f represents a face position.

Table S3 The reaction path for the formation of the C<sub>3</sub> product of the Cu<sub>3</sub>@T-C<sub>3</sub>N<sub>2</sub> catalyst and the relative free energy ( $\Delta G/eV$ )

| Primitive response                                                                                                                                   | Free energy change ( $\Delta G/eV$ ) |
|------------------------------------------------------------------------------------------------------------------------------------------------------|--------------------------------------|
| * +3CO(g) $\rightarrow$ 3*CO                                                                                                                         | -0.73                                |
| 3*CO $\rightarrow$ *COCOCO                                                                                                                           | 0.10                                 |
| *COCOCO + H <sup>+</sup> + e <sup>-</sup> $\rightarrow$ *COCO <sub>H</sub> CO                                                                        | -0.25                                |
| *COCO <sub>H</sub> CO + H <sup>+</sup> + e <sup>-</sup> $\rightarrow$ *COCCO+H <sub>2</sub> O                                                        | -0.18                                |
| *COCCO + H <sup>+</sup> + e <sup>-</sup> $\rightarrow$ *CHCOCO                                                                                       | -0.14                                |
| *CHCOCO + H <sup>+</sup> + e <sup>-</sup> $\rightarrow$ *CHCO <sub>H</sub> CO                                                                        | -0.20                                |
| *CHCO <sub>H</sub> CO + H <sup>+</sup> + e <sup>-</sup> $\rightarrow$ *CHCO <sub>H</sub> CHO                                                         | -0.28                                |
| *CHCO <sub>H</sub> CHO + H <sup>+</sup> + e <sup>-</sup> $\rightarrow$ *CHCCHO+H <sub>2</sub> O                                                      | 0.18                                 |
| *CHCCHO + H <sup>+</sup> + e <sup>-</sup> $\rightarrow$ *CH <sub>2</sub> CCHO                                                                        | -0.43                                |
| *CH <sub>2</sub> CCHO + H <sup>+</sup> + e <sup>-</sup> $\rightarrow$ *CH <sub>2</sub> CHCHO                                                         | 0.09                                 |
| *CH <sub>2</sub> CHCHO + H <sup>+</sup> + e <sup>-</sup> $\rightarrow$ *CH <sub>2</sub> CHCHO <sub>H</sub>                                           | 0.09                                 |
| *CH <sub>2</sub> CHCHO <sub>H</sub> + H <sup>+</sup> + e <sup>-</sup> $\rightarrow$ *CH <sub>2</sub> CHCH+H <sub>2</sub> O                           | -0.03                                |
| *CH <sub>2</sub> CHCHO <sub>H</sub> + H <sup>+</sup> + e <sup>-</sup> $\rightarrow$ *CH <sub>3</sub> CHCHO <sub>H</sub>                              | 0.03                                 |
| *CH <sub>2</sub> CHCH + H <sup>+</sup> + e <sup>-</sup> $\rightarrow$ *CH <sub>2</sub> CHCH <sub>2</sub>                                             | -0.86                                |
| *CH <sub>3</sub> CHCHO <sub>H</sub> + H <sup>+</sup> + e <sup>-</sup> $\rightarrow$ *CH <sub>3</sub> CH <sub>2</sub> CHO <sub>H</sub>                | -0.61                                |
| *CH <sub>2</sub> CHCH <sub>2</sub> + H <sup>+</sup> + e <sup>-</sup> $\rightarrow$ CH <sub>3</sub> CHCH <sub>2</sub>                                 | 0.24                                 |
| *CH <sub>3</sub> CH <sub>2</sub> CHO <sub>H</sub> + H <sup>+</sup> + e <sup>-</sup> $\rightarrow$ CH <sub>3</sub> CH <sub>2</sub> CH <sub>2</sub> OH | 0.14                                 |

Table S4 Cu-Cu, Cu-N bond lengths, and the distances between the three Cu sites and the T-C<sub>3</sub>N<sub>2</sub> sheet during the progress for C<sub>3</sub> products.

|                                                     | Cu-Cu/Å | Cu-N/Å | h <sub>Cu1</sub> /Å | h <sub>Cu2</sub> /Å | h <sub>Cu3</sub> /Å |
|-----------------------------------------------------|---------|--------|---------------------|---------------------|---------------------|
| *+3CO                                               | 2.1730  | 1.9191 | 0.0000              | 0.0000              | 0.0000              |
| *3CO                                                | 2.4926  | 2.1189 | 1.3582              | 1.3574              | 1.3506              |
| *COCOCO                                             | 2.3965  | 2.0538 | 1.2282              | 1.0854              | 1.0478              |
| *COCOHC                                             | 2.3264  | 2.0759 | 1.1318              | 1.0621              | 1.0467              |
| *COCCO                                              | 2.4138  | 2.0378 | 1.0662              | 1.0590              | 1.1880              |
| *CHCOCO                                             | 2.3600  | 2.0903 | 1.1085              | 1.1134              | 1.1158              |
| *CHCOHC                                             | 2.4391  | 2.1668 | 1.1128              | 1.2262              | 1.2153              |
| *CHCOHCHO                                           | 2.3435  | 2.2154 | 1.1076              | 0.2428              | 1.2237              |
| *CHCCHO                                             | 2.4832  | 2.0112 | 1.1361              | 1.1438              | 1.1107              |
| *CH <sub>2</sub> CCHO                               | 2.5251  | 2.0040 | 0.1141              | 1.1894              | 1.1660              |
| *CH <sub>2</sub> CHCHO                              | 2.4172  | 2.2024 | 0.9729              | 1.3647              | 1.1453              |
| *CH <sub>2</sub> CHCHOH                             | 2.3309  | 2.1121 | 1.0638              | 1.0093              | 1.1077              |
| *CH <sub>3</sub> CHCHOH                             | 2.5250  | 2.0518 | 0.0000              | 0.0000              | 0.9068              |
| *CH <sub>3</sub> CH <sub>2</sub> CHOH               | 2.2975  | 1.9526 | 0.9714              | 1.1906              | 0.2610              |
| *CH <sub>3</sub> CH <sub>2</sub> CH <sub>2</sub> OH | 2.2209  | 1.9539 | 0.6586              | 0.6977              | 0.6626              |

Table S5 The reaction path for the formation of the C<sub>1</sub> product of the Cu<sub>3</sub>@T-C<sub>3</sub>N<sub>2</sub> catalyst and the relative free energy ( $\Delta G/eV$ )

| Primitive response                                                                | Free energy change ( $\Delta G/eV$ ) |
|-----------------------------------------------------------------------------------|--------------------------------------|
| *+3CO(g)→3*CO                                                                     | -0.73                                |
| 3*CO+H <sup>+</sup> +e <sup>-</sup> →*CHO+2*CO                                    | 0.24                                 |
| 3*CO+H <sup>+</sup> +e <sup>-</sup> →*COH+2*CO                                    | 2.27                                 |
| *CHO+2*CO+H <sup>+</sup> +e <sup>-</sup> →*CHOH+2*CO                              | 0.79                                 |
| *CHO+2*CO+H <sup>+</sup> +e <sup>-</sup> →*CH <sub>2</sub> O+2*CO                 | 0.20                                 |
| *CHOH+2*CO+H <sup>+</sup> +e <sup>-</sup> →*CH <sub>2</sub> OH+2*CO               | -0.39                                |
| *CHOH+2*CO+H <sup>+</sup> +e <sup>-</sup> →*CH+2*CO                               | -0.15                                |
| *CH <sub>2</sub> OH+2*CO+H <sup>+</sup> +e <sup>-</sup> →*CH <sub>3</sub> OH+2*CO | -0.65                                |
| *CH <sub>2</sub> OH+2*CO+H <sup>+</sup> +e <sup>-</sup> →*CH <sub>2</sub> +2*CO   | -0.46                                |
| *CH <sub>2</sub> +2*CO+H <sup>+</sup> +e <sup>-</sup> →*CH <sub>3</sub> +2*CO     | -0.86                                |
| *CH <sub>3</sub> +2*CO+H <sup>+</sup> +e <sup>-</sup> →*CH <sub>4</sub> +2*CO     | -0.55                                |

Table S6 The reaction path for the formation of the C<sub>2</sub> product of the Cu<sub>3</sub>@T-C<sub>3</sub>N<sub>2</sub> catalyst and the relative free energy ( $\Delta G/eV$ )

| Primitive response                                                                                                             | Free energy change ( $\Delta G/eV$ ) |
|--------------------------------------------------------------------------------------------------------------------------------|--------------------------------------|
| *+3CO(g)→3*CO                                                                                                                  | -0.73                                |
| 3*CO+H <sup>+</sup> +e <sup>-</sup> →*CHO+2*CO                                                                                 | 0.24                                 |
| *CHO+2*CO→*COCHO+*CO                                                                                                           | 0.09                                 |
| *COCHO+*CO+H <sup>+</sup> +e <sup>-</sup> →*COHCHO+*CO                                                                         | 0.00                                 |
| *COHCHO+*CO+H <sup>+</sup> +e <sup>-</sup> →*CCHO+*CO+H <sub>2</sub> O                                                         | -0.32                                |
| *CCHO+*CO+H <sup>+</sup> +e <sup>-</sup> →*CHCHO+*CO                                                                           | -0.57                                |
| *CHCHO+*CO+H <sup>+</sup> +e <sup>-</sup> →*CH <sub>2</sub> CHO+*CO                                                            | -0.23                                |
| *CH <sub>2</sub> CHO+*CO+H <sup>+</sup> +e <sup>-</sup> →*CH <sub>2</sub> CHOH+*CO                                             | 0.49                                 |
| *CH <sub>2</sub> CHOH+*CO+H <sup>+</sup> +e <sup>-</sup> →*CH <sub>2</sub> CH <sub>2</sub> OH+*CO                              | -0.44                                |
| *CH <sub>2</sub> CH <sub>2</sub> OH+*CO+H <sup>+</sup> +e <sup>-</sup> →CH <sub>3</sub> CH <sub>2</sub> OH+*CO                 | -0.18                                |
| *CH <sub>2</sub> CH <sub>2</sub> OH+*CO+H <sup>+</sup> +e <sup>-</sup> →*CH <sub>2</sub> CH <sub>2</sub> +*CO+H <sub>2</sub> O | -0.36                                |
| *CH <sub>2</sub> CH <sub>2</sub> +*CO→CH <sub>2</sub> CH <sub>2</sub> +*CO                                                     | 0.30                                 |

Table S7 Optimized energy and CONTCAR

|                     | Structure                                          | Energy        |
|---------------------|----------------------------------------------------|---------------|
| Adsorption          | $\text{Cu}_3@T\text{-C}_3\text{N}_2$               | -181.14226485 |
|                     | *CO-p                                              | -196.96757572 |
|                     | *2CO-pp                                            | -212.61634141 |
|                     | *3CO-ppp                                           | -227.92162500 |
|                     | *CO-f                                              | -197.96212000 |
|                     | *2CO-pf                                            | -213.22065000 |
|                     | *3CO-ppf                                           | -228.10627299 |
| TS                  | TS1 from 3*CO-ppp to 3*CO-bbb                      | -227.01163784 |
|                     | 3*CO-bbb                                           | -227.19550669 |
|                     | TS2 from 3*CO-bbb to *COCOCO                       | -226.895296   |
|                     | *COCOCO                                            | -228.01356096 |
|                     | TS1 from 3*CO-ppp to *COCO+*CO                     | -227.09346670 |
|                     | *COCO+*CO                                          | -227.19663000 |
|                     | TS2 from *COCO+*CO to *COCOCO                      | -226.9451288  |
|                     | 3*CO-ppf                                           | -228.10627299 |
|                     | TS1 from 3*CO-ppf to *COCO+*CO                     | -226.96372172 |
|                     | *COCO+*CO                                          | -227.19663000 |
|                     | TS from 3*CO-ppf to *COCOCO                        | -226.86343535 |
| C <sub>3</sub> path | *COCO HCO                                          | -232.0038137  |
|                     | *COCCO                                             | -221.02736974 |
|                     | *CHCOCO                                            | -224.9759038  |
|                     | *CHCO HCO                                          | -228.9325488  |
|                     | *CHCO HCHO                                         | -232.92928745 |
|                     | *CHCCHO                                            | -221.54947233 |
|                     | *CH <sub>2</sub> CCHO                              | -225.76503233 |
|                     | *CH <sub>2</sub> CHCHO                             | -229.398671   |
|                     | *CH <sub>2</sub> CHCHOH                            | -233.0363195  |
|                     | *CH <sub>2</sub> CHCH                              | -221.9060828  |
|                     | *CH <sub>3</sub> CHCHOH                            | -236.7936818  |
|                     | *CH <sub>2</sub> CHCH <sub>2</sub>                 | -226.4972252  |
|                     | *CH <sub>3</sub> CH <sub>2</sub> CHOH              | -241.1434035  |
|                     | CH <sub>3</sub> CHCH <sub>2</sub>                  | -229.9743444  |
|                     | CH <sub>3</sub> CH <sub>2</sub> CH <sub>2</sub> OH | -244.7360426  |
| C <sub>1</sub> path | *CHO+2*CO                                          | -231.4834829  |

|                     |                                         |              |
|---------------------|-----------------------------------------|--------------|
|                     | *COH+2*CO                               | -229.4693639 |
|                     | *CHOH+2*CO                              | -234.4203718 |
|                     | CH <sub>2</sub> O+2*CO                  | -234.893457  |
|                     | *CH <sub>2</sub> OH+2*CO                | -238.5545784 |
|                     | *CH+2*CO                                | -223.4810031 |
|                     | *CH <sub>2</sub> +2*CO                  | -227.8247217 |
|                     | *CH <sub>3</sub> OH+2*CO                | -242.8715262 |
|                     | *CH <sub>3</sub> +2*CO                  | -232.4196046 |
|                     | *CH <sub>4</sub> +2*CO                  | -236.6091254 |
| C <sub>2</sub> path | *COCHO+*CO                              | -231.3604608 |
|                     | *COHCHO+*CO                             | -235.2001934 |
|                     | *CCHO+*CO                               | -224.3806900 |
|                     | *CHCHO+*CO                              | -228.6842368 |
|                     | *CH <sub>2</sub> CHO+*CO                | -232.7006568 |
|                     | *CH <sub>2</sub> CHOH+*CO               | -235.920168  |
|                     | *CH <sub>2</sub> CH <sub>2</sub> OH+*CO | -240.1307666 |
|                     | *CH <sub>3</sub> CH <sub>2</sub> OH+*CO | -244.0166579 |
|                     | *CH <sub>2</sub> CH <sub>2</sub> +*CO   | -229.3380316 |
|                     | CH <sub>2</sub> CH <sub>2</sub> +*CO    | -228.9519672 |

Cu<sub>3</sub>@T-C<sub>3</sub>N<sub>2</sub>

C12Cu3N8

1.00000000000000

8.8479248825893926 -0.0000092988285700 -0.0000037371687024

-4.4239698369999658 7.6625187567800541 0.0000028950696540

-0.0000083164190687 0.0000029202282706 19.5595854150194626

C N Cu

12 8 3

Direct

0.2089720261321616 0.7271210583848305 0.4999999576717067

0.2728736380598649 0.4818497388910873 0.4999999427870470

0.5181463252039141 0.7910273295626427 0.5000004561084884

0.7938646647504656 0.2838651898593332 0.5000000863542472

0.7161297856546593 0.5099981727719413 0.5000000420100361

0.4899998370568560 0.2061358243598988 0.4999999867250209

0.0221200686923968 0.5990983695436697 0.5000000272476381

0.4009010732030113 0.4230215459757937 0.4999999377432477

0.5769783680603306 0.9778799956301649 0.5000000836235190

0.9758086660034886 0.4205822981821677 0.5000000349075365

0.5794244075257868 0.5552325106141389 0.5000000167346175

0.4447690496171681 0.0241889534868168 0.4999999837401615

0.2725879336705323 0.9000460600454712 0.4999999155784879

0.0999633064089792 0.3725441187470688 0.4999999341799118

|                    |                    |                    |
|--------------------|--------------------|--------------------|
| 0.6274576320011672 | 0.7274097811754074 | 0.5000001144872045 |
| 0.7472753774022294 | 0.1132674838455564 | 0.5000000917154844 |
| 0.8867326984531448 | 0.6340077482235380 | 0.5000000854366353 |
| 0.3659924705072869 | 0.2527218308342736 | 0.4999999083819993 |
| 0.3333344345972735 | 0.6666664791543746 | 0.4999999949180256 |
| 0.6666699381883561 | 0.3333336365620184 | 0.5000000480170310 |
| 0.9668217544369750 | 0.1222646465582495 | 0.4999996505485360 |
| 0.8777356518871637 | 0.8445583408863574 | 0.5000000740754373 |
| 0.1554409324867988 | 0.0331788577052001 | 0.4999996270079801 |

\*CO-p

C13Cu3N8O1

1.0000000000000000

|                     |                    |                     |
|---------------------|--------------------|---------------------|
| 8.8479003905999996  | 0.0000000000000000 | 0.0000000000000000  |
| -4.4239634595000004 | 7.6624988503000004 | 0.0000000000000000  |
| 0.0000000000000000  | 0.0000000000000000 | 19.5596008300999991 |

| C  | N | Cu | O |
|----|---|----|---|
| 13 | 8 | 3  | 1 |

Direct

|                    |                    |                    |
|--------------------|--------------------|--------------------|
| 0.2049043749218116 | 0.7212252668639944 | 0.4941068357657005 |
| 0.2694864078130054 | 0.4772855525709343 | 0.4910804595889621 |
| 0.5149013730671127 | 0.7876374170189816 | 0.4954674251874221 |
| 0.7889225680192141 | 0.2772939999233663 | 0.4890761963715043 |
| 0.7156782469394376 | 0.5096888701471750 | 0.4931323650845997 |
| 0.4831179258707424 | 0.2027659271699840 | 0.4884675356147439 |
| 0.0182187777830565 | 0.5922754845229470 | 0.4947570000513647 |
| 0.3998754071564247 | 0.4223271832218648 | 0.4907430695655462 |
| 0.5693575453517233 | 0.9733182781407630 | 0.4923102340707717 |
| 0.9720435645696601 | 0.4127238682272818 | 0.4900358091996302 |
| 0.5799754733021849 | 0.5561000883799243 | 0.4936852776887204 |
| 0.4365842406586138 | 0.0194411433301096 | 0.4900226213533386 |
| 0.8968645746411480 | 0.8775166182292106 | 0.6423941320553990 |
| 0.2640592434613852 | 0.8933939416301980 | 0.4937652344718221 |
| 0.0970441794908307 | 0.3640894453463994 | 0.4900313808936058 |
| 0.6287595037467664 | 0.7292025390378229 | 0.4997211228026651 |
| 0.7400955535783812 | 0.1061134208322128 | 0.4920870048942932 |
| 0.8863024971879594 | 0.6324373280999173 | 0.4998894433970971 |
| 0.3597608551407777 | 0.2501491599038373 | 0.4906616859475774 |
| 0.3296439387484940 | 0.6621533258600073 | 0.4925310359832414 |
| 0.6627282308089369 | 0.3303015587703658 | 0.4872583481585683 |
| 0.9540758845540799 | 0.1109943030430234 | 0.5146703709348862 |
| 0.8599348428037537 | 0.8196891936221363 | 0.5533244131425114 |
| 0.1525525315202898 | 0.0246240836635523 | 0.5198204852113794 |
| 0.9401723498641636 | 0.9430820304440073 | 0.6958704855646702 |

\*2CO-pp

C14Cu3N8O2

```
1.0000000000000000
  8.8479003905999996    0.0000000000000000    0.0000000000000000
 -4.4239634595000004    7.6624988503000004    0.0000000000000000
  0.0000000000000000    0.0000000000000000    19.5596008300999991
```

```
  C    N    Cu    O
  14     8     3     2
```

Direct

```
0.2077136141479893  0.7264698788815572  0.4919583588990294
0.2727087857577821  0.4812677308655222  0.4864019927086378
0.5176912588419486  0.7909791080486421  0.4876588326257976
0.7925295747074442  0.2789918976234313  0.4841005646450401
0.7201605517089377  0.5133623215076247  0.4874479820745512
0.4854952551247114  0.2068277614686984  0.4853026326228457
0.0212862483563596  0.5944759315798508  0.4913360373737106
0.4045332085897260  0.4267248923011381  0.4860877833209133
0.5720110791026618  0.9772563585034315  0.4860329470908730
0.9760098382257710  0.4152282323606890  0.4858713511960633
0.5842354435696953  0.5611788143552886  0.4861830741674426
0.4382276857710857  0.0229323660374972  0.4875792455269878
0.7996586130035740  0.7924580253140769  0.6417148658590264
0.2336677580044639  0.0904544177890336  0.6421845145377197
0.2650272584564907  0.8985939334970119  0.4942684917382885
0.1007745682585554  0.3658206331458742  0.4854697360556564
0.6325538125376928  0.7343977381958419  0.4884121049200387
0.7449830686098321  0.1083148254607743  0.4850441872129218
0.8901811561312142  0.6355667284127999  0.4945339061077391
0.3631875588069890  0.2546850460902686  0.4879662158207849
0.3321159426829592  0.6660060598108195  0.4881215800841389
0.6662369397987271  0.3332007921258388  0.4830963074520389
0.9672720239921031  0.1057130084145683  0.5065808084069259
0.8630745024256279  0.8206843761803276  0.5516288221716218
0.1799012265932227  0.0433163166196033  0.5515734156180764
0.7797282000771577  0.8174518289999007  0.6983614046039563
0.2319748927172774  0.1232710044098820  0.6995527901591638
```

\*3CO-ppp

C15Cu3N8O3

```
1.0000000000000000
  8.8479003905999996    0.0000000000000000    0.0000000000000000
 -4.4239634595000004    7.6624988503000004    0.0000000000000000
  0.0000000000000000    0.0000000000000000    19.5596008300999991
```

| C                  | N                  | Cu                 | O |
|--------------------|--------------------|--------------------|---|
| 15                 | 8                  | 3                  | 3 |
| Direct             |                    |                    |   |
| 0.2067965964141081 | 0.7278250880969498 | 0.4856847982942851 |   |
| 0.2713636719341668 | 0.4820722252677201 | 0.4856833885611912 |   |
| 0.5170777289900581 | 0.7923716457513356 | 0.4858092702710953 |   |
| 0.7914745702449979 | 0.2798615719127081 | 0.4812244028308618 |   |
| 0.7193718820463121 | 0.5146907535077004 | 0.4811091565599982 |   |
| 0.4845659388610116 | 0.2077831769488692 | 0.4813118735782375 |   |
| 0.0203834677345140 | 0.5957073765580310 | 0.4842924504249713 |   |
| 0.4034558196775394 | 0.4276868341592695 | 0.4844308194631022 |   |
| 0.5714711918174127 | 0.9788306304413902 | 0.4845874255076939 |   |
| 0.9750431745089820 | 0.4161082989336331 | 0.4828150189271649 |   |
| 0.5830539875095564 | 0.5619433353760838 | 0.4828827975277628 |   |
| 0.4372680983860208 | 0.0241971693471003 | 0.4830527639424780 |   |
| 0.8148501437141359 | 0.7596239858657042 | 0.6370214094315444 |   |
| 0.2330569719263015 | 0.0575285296097533 | 0.6372926415998947 |   |
| 0.9417470041939960 | 0.1872812580559289 | 0.6367330435573574 |   |
| 0.2634107494731856 | 0.8995309373331966 | 0.4874268146316225 |   |
| 0.0996894589096956 | 0.3669810705914439 | 0.4872492406078334 |   |
| 0.6321611860545333 | 0.7356993206052638 | 0.4873884337972459 |   |
| 0.7438146440680841 | 0.1097424909861324 | 0.4866597122495209 |   |
| 0.8894727512619328 | 0.6371809316064667 | 0.4863541521876633 |   |
| 0.3620288400611979 | 0.2552954892903606 | 0.4866280666098681 |   |
| 0.3317561384007887 | 0.6674178968031743 | 0.4841532511542440 |   |
| 0.6651151860226356 | 0.3340811255530650 | 0.4767516800195411 |   |
| 0.9545334901112127 | 0.1369243481747608 | 0.5461903309114179 |   |
| 0.8618440116858814 | 0.8203488016263978 | 0.5461502714105819 |   |
| 0.1781342050796645 | 0.0441137830132193 | 0.5458017025744804 |   |
| 0.8155062558591717 | 0.7613428317286196 | 0.6963004766097270 |   |
| 0.2267930233311190 | 0.0573466055389498 | 0.6965307830316543 |   |
| 0.9435398667217576 | 0.1896425503168138 | 0.6959937557269895 |   |

\*CO-f

C13Cu3N8O1

1.0000000000000000

8.8479003899999995 0.0000000000000000 0.0000000000000000

-4.4239634600000004 7.6624988500000004 0.0000000000000000

0.0000000000000000 0.0000000000000000 19.5596008300000008

| C  | N | O | Cu |
|----|---|---|----|
| 13 | 8 | 1 | 3  |

Direct

0.6959063245111952 0.2260072210050544 0.4918012712763198

0.7618415241357527 0.9816865782679303 0.4924473435922874

|                    |                    |                    |
|--------------------|--------------------|--------------------|
| 0.0059607064650794 | 0.2920087339804321 | 0.4920426626595036 |
| 0.2821057500993164 | 0.7824647155692033 | 0.4879156437405415 |
| 0.2053987099330292 | 0.0114454151651864 | 0.4871109463969080 |
| 0.9766980992991892 | 0.7060336421823227 | 0.4873622236790299 |
| 0.5112063917781497 | 0.0977348949070511 | 0.4901292195889190 |
| 0.8902489433901107 | 0.9254030730346722 | 0.4904140360671104 |
| 0.0627564653829341 | 0.4768433726448574 | 0.4907819316689325 |
| 0.4632289440438794 | 0.9173544700997989 | 0.4897192837792337 |
| 0.0704273541434271 | 0.0577394738332206 | 0.4890589738534607 |
| 0.9304613267419605 | 0.5248492462462993 | 0.4892091199226800 |
| 0.4889915932576891 | 0.4956154256899754 | 0.5980998644494399 |
| 0.7564327782424136 | 0.4000499541870784 | 0.4934904058710174 |
| 0.5878648246676016 | 0.8681454129308089 | 0.4950776948138548 |
| 0.1194227200305121 | 0.2315523682930194 | 0.4936853055152381 |
| 0.2350426814060641 | 0.6106934998705166 | 0.4931059387210348 |
| 0.3773213012296055 | 0.1361801192319933 | 0.4913641738566840 |
| 0.8520222468600177 | 0.7532487072486236 | 0.4918470500000787 |
| 0.8211534502930022 | 0.1665591187509613 | 0.4908189087453015 |
| 0.1547111148423782 | 0.8332697556206546 | 0.4837025603398255 |
| 0.4898383943833114 | 0.4899908517467119 | 0.6591935307180582 |
| 0.4493338495300511 | 0.6305586569098427 | 0.5312150840471458 |
| 0.3576814579476577 | 0.3316030837206730 | 0.5277967345395853 |
| 0.6565460673856781 | 0.5388231388631073 | 0.5279699521578278 |

\*2CO-pf

C14Cu3N8O2

1.0000000000000000

8.8479003899999995 0.0000000000000000 0.0000000000000000

-4.4239634600000004 7.6624988500000004 0.0000000000000000

0.0000000000000000 0.0000000000000000 19.5596008300000008

C N O Cu

14 8 2 3

Direct

0.6948023413137074 0.2336086523626810 0.4896081354058984

0.7601361647256563 0.9891379974252784 0.4892230902760460

0.0056570632794039 0.3002708966773852 0.4905387170949791

0.2803329192381514 0.7908226018600411 0.4850578078317184

0.2064232473804833 0.0223285977103450 0.4873650274667751

0.9746115588496578 0.7147663514614271 0.4849249080803824

0.5097517192908082 0.1054494767222180 0.4890384439068680

0.8900200656908734 0.9344139007312717 0.4880597612600510

0.0600123253194198 0.4847012343849423 0.4880534316549396

0.4617563993382974 0.9246664356757837 0.4866529633153129

0.0710912672187049 0.0686258795688377 0.4889832576005825

|                    |                    |                    |
|--------------------|--------------------|--------------------|
| 0.9283382294950152 | 0.5331158610331987 | 0.4867763285961162 |
| 0.2592781009311282 | 0.1962522040940536 | 0.6391220785018734 |
| 0.5195407440982746 | 0.5536931286611330 | 0.5977366906298689 |
| 0.7539906630230305 | 0.4074218322737359 | 0.4907791972510602 |
| 0.5861435744915467 | 0.8746416847820390 | 0.4900541830145542 |
| 0.1205614985726874 | 0.2425204156368768 | 0.4943397339863402 |
| 0.2324711189302125 | 0.6182361797661138 | 0.4887013475275812 |
| 0.3780990082420532 | 0.1462858608979057 | 0.4927213626869224 |
| 0.8500766583813313 | 0.7613795527903403 | 0.4885298485341376 |
| 0.8199257631124978 | 0.1741454896493420 | 0.4885550650654997 |
| 0.1536379955327244 | 0.8427983650562254 | 0.4823641431273612 |
| 0.2204945480505096 | 0.1281378417901285 | 0.6915009606307583 |
| 0.5539655502306783 | 0.6018250276377011 | 0.6558141707546119 |
| 0.4399240521141118 | 0.6264601105606366 | 0.5220024210425965 |
| 0.3450079682454257 | 0.3201581729175765 | 0.5570284871237978 |
| 0.6464095849035872 | 0.5367408078727576 | 0.5227988676333689 |

\*3CO-ppf

C15Cu3N8O3

1.0000000000000000

8.8479003899999995 0.0000000000000000 0.0000000000000000

-4.4239634600000004 7.6624988500000004 0.0000000000000000

0.0000000000000000 0.0000000000000000 19.5596008300000008

C N O Cu

15 8 3 3

Direct

|                    |                    |                    |
|--------------------|--------------------|--------------------|
| 0.7076137971514511 | 0.2447198881841833 | 0.4900768120598673 |
| 0.7741795045001960 | 0.0003011909042522 | 0.4864679314210876 |
| 0.0187092886839443 | 0.3106105447514343 | 0.4883020341748867 |
| 0.2938368709818863 | 0.7999117156385885 | 0.4818216030149663 |
| 0.2196277332926939 | 0.0320845627847434 | 0.4874746213755161 |
| 0.9865820774199029 | 0.7250870710399709 | 0.4853558568292710 |
| 0.5228465147306685 | 0.1150727180840816 | 0.4890797677342795 |
| 0.9039492045562485 | 0.9451823150930685 | 0.4872355652577536 |
| 0.0729256383554678 | 0.4950912980315761 | 0.4852390664524766 |
| 0.4751865184906199 | 0.9344478714784066 | 0.4837733922337568 |
| 0.0849183382058842 | 0.0793484591310724 | 0.4881107524741795 |
| 0.9397154495725593 | 0.5424875617812240 | 0.4868156932795836 |
| 0.2693036620432686 | 0.2123705177641447 | 0.6379143155353790 |
| 0.4889284285877827 | 0.5692682506340621 | 0.5980035397761613 |
| 0.8060999895958514 | 0.5496996854520938 | 0.6317766611806040 |
| 0.7659500949440603 | 0.4179808855484934 | 0.4927259078285394 |
| 0.6005122802590395 | 0.8846149704732112 | 0.4844960328871954 |
| 0.1342581163737750 | 0.2536719289988310 | 0.4917329561868899 |

|                    |                    |                    |
|--------------------|--------------------|--------------------|
| 0.2463195579219080 | 0.6275103990815831 | 0.4830315840257047 |
| 0.3910527996104358 | 0.1555804580550851 | 0.4935325701650745 |
| 0.8624888730071529 | 0.7722626454444093 | 0.4900673111946961 |
| 0.8330023502193894 | 0.1847491877333705 | 0.4874543780534922 |
| 0.1660198731057627 | 0.8519011594287587 | 0.4815491093379201 |
| 0.2417617538243199 | 0.1678682499901107 | 0.6941253884949125 |
| 0.4762496671148890 | 0.6202450635516875 | 0.6531478857030548 |
| 0.8541927871107838 | 0.4971323324058600 | 0.6755942123075501 |
| 0.4650770770496980 | 0.6338125508057422 | 0.5090318593858593 |
| 0.3622691444779172 | 0.3328669941725816 | 0.5541772443284557 |
| 0.6840264888124484 | 0.5587357235573716 | 0.5527449873008949 |

3\*CO-ppp

C15Cu3N8O3

1.0000000000000000

8.8479003905999996 0.0000000000000000 0.0000000000000000

-4.4239634595000004 7.6624988503000004 0.0000000000000000

0.0000000000000000 0.0000000000000000 19.5596008300999991

C N Cu O

15 8 3 3

Direct

|                    |                    |                    |
|--------------------|--------------------|--------------------|
| 0.6960600020000030 | 0.2353700399999994 | 0.4856800140000033 |
| 0.7606300120000000 | 0.9896199699999997 | 0.4856800140000033 |
| 0.0063499999999976 | 0.2999199630000007 | 0.4858100120000017 |
| 0.2807399929999974 | 0.7874100209999995 | 0.4812200069999975 |
| 0.2086399940000021 | 0.0222300289999993 | 0.4811100069999981 |
| 0.9738299850000018 | 0.7153300049999984 | 0.4813100100000014 |
| 0.5096499919999999 | 0.1032500270000014 | 0.4842900040000018 |
| 0.8927199840000029 | 0.9352300170000021 | 0.4844299849999985 |
| 0.0607400009999992 | 0.4863699670000017 | 0.4845899939999967 |
| 0.4643099899999967 | 0.9236500259999971 | 0.4828099910000034 |
| 0.0723199990000012 | 0.0694899559999982 | 0.4828799960000012 |
| 0.9265400170000007 | 0.5317400100000000 | 0.4830499890000013 |
| 0.3041200039999978 | 0.2671699520000033 | 0.6370199919999990 |
| 0.7223199609999966 | 0.5650699729999999 | 0.6372900009999967 |
| 0.4310100080000012 | 0.6948199870000025 | 0.6367300149999977 |
| 0.7526800039999983 | 0.4070700409999972 | 0.4874300059999968 |
| 0.5889599919999995 | 0.8745200039999972 | 0.4872500000000031 |
| 0.1214300019999968 | 0.2432399989999965 | 0.4873900119999988 |
| 0.2330800000000011 | 0.6172900199999987 | 0.4866600040000009 |
| 0.3787400129999980 | 0.1447199580000031 | 0.4863500000000016 |
| 0.8513000009999985 | 0.7628399729999984 | 0.4866299930000011 |
| 0.8210200070000013 | 0.1749600169999965 | 0.4841499919999990 |
| 0.1543799940000028 | 0.8416200280000012 | 0.4767499860000015 |

|                    |                    |                    |
|--------------------|--------------------|--------------------|
| 0.4438000020000032 | 0.6444699760000034 | 0.5461900230000012 |
| 0.3511100110000029 | 0.3278900379999996 | 0.5461500290000032 |
| 0.6674000020000008 | 0.5516600010000019 | 0.5457999710000010 |
| 0.3047699930000007 | 0.2688900229999973 | 0.6963000300000033 |
| 0.7160600420000023 | 0.5648900269999970 | 0.6965299840000014 |
| 0.4328100090000007 | 0.6971899870000016 | 0.6959900259999969 |

TS1 from 3\*CO-ppp to 3\*CO-bbb

C15N8Cu3O3

1.0000000000000000

|                     |                    |                     |
|---------------------|--------------------|---------------------|
| 8.8479003905999996  | 0.0000000000000000 | 0.0000000000000000  |
| -4.4239539850714298 | 7.6625043203714300 | 0.0000000000000000  |
| 0.0000000000000000  | 0.0000000000000000 | 19.5596008300999991 |

|    |   |    |   |
|----|---|----|---|
| C  | N | Cu | O |
| 15 | 8 | 3  | 3 |

Direct

|                    |                    |                    |
|--------------------|--------------------|--------------------|
| 0.6939096276025045 | 0.2209548722752488 | 0.4886424549551986 |
| 0.7613447261985047 | 0.9773720295198870 | 0.4886184210028435 |
| 0.0049346140782531 | 0.2883866844549804 | 0.4886538776180848 |
| 0.2802454299882461 | 0.7763923671326959 | 0.4804619301446564 |
| 0.2058402803072287 | 0.0082323339651452 | 0.4804294164560406 |
| 0.9739925401852918 | 0.7019948421634163 | 0.4804461484774857 |
| 0.5097232582504498 | 0.0916529865469019 | 0.4848852326155156 |
| 0.8906142215840106 | 0.9224624692735680 | 0.4848879520275811 |
| 0.0598260520074292 | 0.4725707587752032 | 0.4849439300301114 |
| 0.4618660623759908 | 0.9109123934241012 | 0.4843114091489515 |
| 0.0714009781177451 | 0.0553809335161739 | 0.4842868993209991 |
| 0.9268865339128054 | 0.5204030065528731 | 0.4843155821774633 |
| 0.4879810685088069 | 0.3126318518391490 | 0.6135416924484611 |
| 0.6686462517163370 | 0.6801932859663423 | 0.6133790526063208 |
| 0.3020133885761985 | 0.4944039518252678 | 0.6137029979541517 |
| 0.7528351147264173 | 0.3953642525501587 | 0.4928729346733617 |
| 0.5869039468799898 | 0.8619036661003928 | 0.4928295562825291 |
| 0.1204078477674738 | 0.2294076418678342 | 0.4928774476319389 |
| 0.2326020004841912 | 0.6049245752577784 | 0.4849634440354566 |
| 0.3773583519763566 | 0.1320682454121569 | 0.4848873902912538 |
| 0.8501931894215690 | 0.7496824016024997 | 0.4849367153145943 |
| 0.8200741717903917 | 0.1622417574386285 | 0.4860130534315212 |
| 0.1533667751006587 | 0.8288855446266012 | 0.4761867765116921 |
| 0.4449684045197765 | 0.6419304510185886 | 0.5444116684873386 |
| 0.3408098379070106 | 0.3074022213066498 | 0.5440924808622368 |
| 0.6747639832369831 | 0.5375626696876791 | 0.5442083133624401 |
| 0.5399218954451680 | 0.2649084485713509 | 0.6585614458800155 |
| 0.7166059000109521 | 0.7786237902997097 | 0.6588346090998626 |

0.2030672907822099 0.4421836523307455 0.6589187884687925

3\*CO-bbb

C15N8Cu3O3

1.0000000000000000

8.8479003905999996 0.0000000000000000 0.0000000000000000

-4.4239501952999998 7.6625065083999999 0.0000000000000000

0.0000000000000000 0.0000000000000000 19.5596008300999991

C N Cu O

15 8 3 3

Direct

0.6944299940000036 0.2190599440000014 0.4870199860000000

0.7602199909999996 0.9742699860000030 0.4870199860000000

0.0050200000000018 0.2848399880000017 0.4870199860000000

0.2805500030000019 0.7745400069999988 0.4825899900000010

0.2047400029999977 0.0049099920000018 0.4825899900000010

0.9743700029999971 0.6987199779999997 0.4825899900000010

0.5096600059999972 0.0903099780000005 0.4855599999999995

0.8889700169999983 0.9182500240000024 0.4855599999999995

0.0610300000000024 0.4696300029999989 0.4855599999999995

0.4620400069999988 0.9096800089999988 0.4841800029999987

0.0695900019999982 0.0512599950000023 0.4841899870000006

0.9280199999999965 0.5172500010000007 0.4841800029999987

0.5347399710000005 0.3415199519999987 0.6068500279999967

0.6377600430000001 0.6920999880000025 0.6068400139999994

0.2871499959999966 0.4445500369999991 0.6068500279999967

0.7539200189999988 0.3930499550000022 0.4892300070000033

0.5862200259999995 0.8597699999999975 0.4892300070000033

0.1194999960000018 0.2253799439999966 0.4892300070000033

0.2338999959999981 0.6029199959999971 0.4878500100000025

0.3763599990000017 0.1298899649999967 0.4878500100000025

0.8493900300000021 0.7453899980000003 0.4878399970000018

0.8198800090000020 0.1593999859999968 0.4851599930000035

0.1532099989999978 0.8260700109999988 0.4784100059999972

0.4411099849999971 0.6399599909999978 0.5460000039999997

0.3393099899999967 0.3000400069999998 0.5460199709999998

0.6792299749999984 0.5381600259999999 0.5460100170000004

0.5568699840000022 0.2647299770000018 0.6510599850000034

0.7145500179999971 0.7910199760000012 0.6510499720000027

0.1882299930000002 0.4224400519999989 0.6510499720000027

TS2 from 3\*CO-bbb to \*COCOCO

C15N8Cu3O3

1.0000000000000000

|                     |                    |                     |
|---------------------|--------------------|---------------------|
| 8.8479003905999996  | 0.0000000000000000 | 0.0000000000000000  |
| -4.4239501952999998 | 7.6625065083999999 | 0.0000000000000000  |
| 0.0000000000000000  | 0.0000000000000000 | 19.5596008300999991 |

|    |   |    |   |
|----|---|----|---|
| C  | N | Cu | O |
| 15 | 8 | 3  | 3 |

Direct

|                    |                    |                    |
|--------------------|--------------------|--------------------|
| 0.6950379105057936 | 0.2218169758325197 | 0.4877602639243864 |
| 0.7601815507726382 | 0.9762774314483352 | 0.4869071272587746 |
| 0.0056492465341280 | 0.2868549636632567 | 0.4869953591359572 |
| 0.2805171174462355 | 0.7756593685074874 | 0.4827085866030943 |
| 0.2064466882002081 | 0.0080851001825864 | 0.4830616423994016 |
| 0.9739443351616028 | 0.7014454757655882 | 0.4828764252090376 |
| 0.5094718199079575 | 0.0917286548458925 | 0.4862834571322296 |
| 0.8904115565357773 | 0.9208075487134401 | 0.4856289454877198 |
| 0.0611336570526259 | 0.4725812307178173 | 0.4857261366680374 |
| 0.4631646854321448 | 0.9117401888932821 | 0.4843210281324371 |
| 0.0704418450086712 | 0.0546220494558160 | 0.4843421080013406 |
| 0.9273729105039079 | 0.5188683596779932 | 0.4847722923907120 |
| 0.5195740082166124 | 0.3887790521659795 | 0.6220916220919944 |
| 0.6132810247840459 | 0.6621827133168022 | 0.6157996479100528 |
| 0.3285931526329733 | 0.4573465463265706 | 0.6173371147644446 |
| 0.7534880274952964 | 0.3945664569650106 | 0.4896398041788089 |
| 0.5874174387762942 | 0.8621055108911470 | 0.4882104955951120 |
| 0.1199840232177124 | 0.2285253771133079 | 0.4882527021002769 |
| 0.2337255348099027 | 0.6049466700406836 | 0.4869882891715127 |
| 0.3770624204720064 | 0.1318907647745093 | 0.4879214406626036 |
| 0.8501918029291911 | 0.7482085038547002 | 0.4870355201121818 |
| 0.8203341605682147 | 0.1617068041116631 | 0.4858873884475176 |
| 0.1537070796499611 | 0.8283867773101145 | 0.4796683595551733 |
| 0.4428443918498604 | 0.6382670173503897 | 0.5443171476188455 |
| 0.3483026910839543 | 0.3137559595759991 | 0.5417866039820135 |
| 0.6702566810448929 | 0.5378884779149137 | 0.5435691366883434 |
| 0.5410517660713364 | 0.3070776835770062 | 0.6656339952616543 |
| 0.7000960920929074 | 0.7701808063230651 | 0.6567904904902940 |
| 0.2164799139264218 | 0.4263485341891098 | 0.6579549520263140 |

TS1 from 3\*CO-ppp to\*COCO+\*CO

C15N8O3Cu3

|                     |                    |                     |
|---------------------|--------------------|---------------------|
| 1.0000000000000000  |                    |                     |
| 8.8479003899999995  | 0.0000000000000000 | 0.0000000000000000  |
| -4.4239634600000004 | 7.6624988500000004 | 0.0000000000000000  |
| 0.0000000000000000  | 0.0000000000000000 | 19.5596008300000008 |

|    |   |   |    |
|----|---|---|----|
| C  | N | O | Cu |
| 15 | 8 | 3 | 3  |

Direct

|                    |                    |                    |
|--------------------|--------------------|--------------------|
| 0.6921116789201599 | 0.2458227112425200 | 0.4941799595216272 |
| 0.7569171415106548 | 0.0008129906769095 | 0.4915888143679528 |
| 0.0028043748357736 | 0.3110540242123380 | 0.4963638653650277 |
| 0.2777663376283844 | 0.8013392958152676 | 0.4892332991865371 |
| 0.2050090334284072 | 0.0346309860473677 | 0.4910870750229459 |
| 0.9710731501804541 | 0.7275686775453464 | 0.4886587047128023 |
| 0.5066125606514510 | 0.1158318376974625 | 0.4928330000799705 |
| 0.8889798272212124 | 0.9464062147953953 | 0.4907921409714095 |
| 0.0574769490702678 | 0.4975108537867157 | 0.4940388133775634 |
| 0.4599377866771339 | 0.9360292142448532 | 0.4894220196886491 |
| 0.0687020784228063 | 0.0812462334839876 | 0.4932578171735952 |
| 0.9242180294293538 | 0.5436600241929854 | 0.4918051640194006 |
| 0.2740578597273833 | 0.1839057370716952 | 0.6464563483714516 |
| 0.4076416659892814 | 0.5485380058983889 | 0.6390809132223350 |
| 0.5763523314067951 | 0.6482419887897944 | 0.6153585162978938 |
| 0.7508013318103879 | 0.4191526379121290 | 0.4959122291000526 |
| 0.5847182610934910 | 0.8860169849043290 | 0.4907137161101658 |
| 0.1175310932294047 | 0.2545886271120010 | 0.4998304566439413 |
| 0.2300206646196334 | 0.6298381103643437 | 0.4946297850000586 |
| 0.3751442840780846 | 0.1567614883229476 | 0.4964057088435113 |
| 0.8478609807441237 | 0.7741480192170336 | 0.4898693570430811 |
| 0.8173556073485289 | 0.1861913844292038 | 0.4928484424480609 |
| 0.1505073742946154 | 0.8538162352315658 | 0.4865667794397974 |
| 0.2629615439879650 | 0.1136291002962097 | 0.6972246734444185 |
| 0.2823642414008637 | 0.5153324776793887 | 0.6749430566224622 |
| 0.7242414522097587 | 0.7535164586140455 | 0.6398875868106767 |
| 0.4391900821381258 | 0.6404824883021955 | 0.5325801335645766 |
| 0.3492427161722976 | 0.3291128208881428 | 0.5682911232132376 |
| 0.6393750745733411 | 0.5438955459875393 | 0.5348887631925757 |

\*COCO+\*CO

C15Cu3N8O3

|                     |                    |                     |
|---------------------|--------------------|---------------------|
| 1.0000000000000000  |                    |                     |
| 8.8479003899999995  | 0.0000000000000000 | 0.0000000000000000  |
| -4.4239634600000004 | 7.6624988500000004 | 0.0000000000000000  |
| 0.0000000000000000  | 0.0000000000000000 | 19.5596008300000008 |

|    |   |   |    |
|----|---|---|----|
| C  | N | O | Cu |
| 15 | 8 | 3 | 3  |

Direct

|                    |                    |                    |
|--------------------|--------------------|--------------------|
| 0.6925885218332325 | 0.2474536285870433 | 0.4942759377539775 |
| 0.7575025868451504 | 0.0028439081060405 | 0.4908451395425548 |
| 0.0032026938142274 | 0.3125316492811017 | 0.4963465518899542 |
| 0.2784299517707053 | 0.8030749967580106 | 0.4896939896683740 |

|                    |                    |                    |
|--------------------|--------------------|--------------------|
| 0.2057143295234072 | 0.0363297784780720 | 0.4916165973156255 |
| 0.9718863519318559 | 0.7293655145315778 | 0.4885448829192729 |
| 0.5074273370264696 | 0.1175572626505761 | 0.4933328442726263 |
| 0.8896879800428386 | 0.9481727387150501 | 0.4902972080566835 |
| 0.0580879100087417 | 0.4991964569472632 | 0.4941107070220621 |
| 0.4606249453488567 | 0.9379522804003397 | 0.4895851226894595 |
| 0.0691244276935720 | 0.0831972676669422 | 0.4934911092617114 |
| 0.9248331154376672 | 0.5453070772892663 | 0.4916394107554137 |
| 0.2677527732661575 | 0.1713261020124050 | 0.6468109224783011 |
| 0.4060275035263264 | 0.5300743245418283 | 0.6400265495642379 |
| 0.5725878791497414 | 0.6540932835024493 | 0.6151585884545939 |
| 0.7517627306642963 | 0.4207973183749461 | 0.4956458272613712 |
| 0.5856522556439600 | 0.8881754562332641 | 0.4896738966250360 |
| 0.1177780569492445 | 0.2560760664742457 | 0.4995486097010193 |
| 0.2302383672823285 | 0.6315349717636962 | 0.4950235468901885 |
| 0.3755772239182575 | 0.1585185911273323 | 0.4972433641686130 |
| 0.8484213507891462 | 0.7759015688737422 | 0.4891035110638848 |
| 0.8180739986885387 | 0.1878307558851184 | 0.4928915021955834 |
| 0.1511335567015188 | 0.8559514407710223 | 0.4870526410121003 |
| 0.2611771189911874 | 0.1074731034416547 | 0.6987690708476685 |
| 0.2821071397878489 | 0.5098629567882529 | 0.6745648413081620 |
| 0.7199024400543179 | 0.7510124355386879 | 0.6400480046570100 |
| 0.4398669146966056 | 0.6410815565969041 | 0.5313816407585616 |
| 0.3547757351535161 | 0.3284090617331877 | 0.5711116757552843 |
| 0.6379547534602641 | 0.5465372469299761 | 0.5305858961106801 |

TS2 from \*COCO+\*CO to \*COCOCO

C15N8O3Cu3

1.0000000000000000

8.8479003899999995 0.0000000000000000 0.0000000000000000

-4.4239634600000004 7.6624988500000004 0.0000000000000000

0.0000000000000000 0.0000000000000000 19.5596008300000008

C N O Cu

15 8 3 3

Direct

|                    |                    |                    |
|--------------------|--------------------|--------------------|
| 0.6827221980069446 | 0.2425102612722303 | 0.4930656150549522 |
| 0.7478908508264049 | 0.9978431604497009 | 0.4908765604819362 |
| 0.9933794618176816 | 0.3077006878716020 | 0.4958429454643586 |
| 0.2690393913988114 | 0.7973892706352126 | 0.4896955761683161 |
| 0.1948524255748824 | 0.0292403415935562 | 0.4885400550765009 |
| 0.9616509888990540 | 0.7235941019881366 | 0.4873652086589313 |
| 0.4975989653543925 | 0.1124410252420639 | 0.4914172040202903 |
| 0.8795562891334996 | 0.9425301538047101 | 0.4889026965197315 |
| 0.0486122918011668 | 0.4939783327805533 | 0.4944086852217220 |

|                    |                    |                    |
|--------------------|--------------------|--------------------|
| 0.4513760852931861 | 0.9325459224909112 | 0.4895501655849967 |
| 0.0586676583073596 | 0.0759206347896392 | 0.4908327273979087 |
| 0.9149723981136063 | 0.5400428791996881 | 0.4911199268606912 |
| 0.3482286589914110 | 0.2617800961136179 | 0.6428831112095529 |
| 0.4462686725558316 | 0.5539910293631436 | 0.6692303367961231 |
| 0.5733123097307481 | 0.6503723832809093 | 0.6152658600873707 |
| 0.7414039518986703 | 0.4157492385524089 | 0.4951838210950704 |
| 0.5761861882625453 | 0.8837380098147143 | 0.4913338629842464 |
| 0.1077413655922255 | 0.2497552305237572 | 0.4991245916518759 |
| 0.2213151958268524 | 0.6260021401712136 | 0.4967213973557495 |
| 0.3649326948368927 | 0.1519999561527917 | 0.4934753651013757 |
| 0.8388098613872004 | 0.7706325501139357 | 0.4883270417470161 |
| 0.8087467713245008 | 0.1831445903156168 | 0.4916326687176231 |
| 0.1415091981255703 | 0.8490790462436633 | 0.4849557467708954 |
| 0.3673780570969023 | 0.1824483617518377 | 0.6860603433225095 |
| 0.3545142424903783 | 0.5538701627912882 | 0.7132129747476708 |
| 0.7212825246243164 | 0.7716971812106119 | 0.6343794780673200 |
| 0.4294492951833913 | 0.6372961209605223 | 0.5361855687643117 |
| 0.3299843029771414 | 0.3251583269756251 | 0.5542959579585907 |
| 0.6318886839678051 | 0.5419292797862059 | 0.5355403803736917 |

TS1 from 3\*CO-ppf to \*COCO+\*CO

C15N8O3Cu3

1.0000000000000000

8.8479003899999995 0.0000000000000000 0.0000000000000000

-4.4239634600000004 7.6624988500000004 0.0000000000000000

0.0000000000000000 0.0000000000000000 19.5596008300000008

C N O Cu

15 8 3 3

Direct

|                    |                    |                    |
|--------------------|--------------------|--------------------|
| 0.6841047008884763 | 0.2461559806848692 | 0.4903648181204621 |
| 0.7483559412266981 | 1.0011433039329138 | 0.4880358345466895 |
| 0.9942750089128960 | 0.3105942789405224 | 0.4924486905252225 |
| 0.2697615896584387 | 0.8006014327626789 | 0.4877545146631102 |
| 0.1983089983838492 | 0.0360735648677327 | 0.4893200802722025 |
| 0.9632917389518834 | 0.7279103314033031 | 0.4865018477824805 |
| 0.4986148381889711 | 0.1152452694661382 | 0.4901776100891800 |
| 0.8815847560894712 | 0.9473703548684895 | 0.4878521162916846 |
| 0.0488007256623746 | 0.4977527049980214 | 0.4914681412275442 |
| 0.4527567841709459 | 0.9357559544515627 | 0.4868968287287306 |
| 0.0609105676704129 | 0.0827375816324725 | 0.4901271132621214 |
| 0.9157979930996563 | 0.5434878391443153 | 0.4883960242144609 |
| 0.2230909272418924 | 0.1628566873353492 | 0.6403255285791877 |
| 0.5194616622551466 | 0.5249710194533872 | 0.6513291907310024 |

|                    |                    |                    |
|--------------------|--------------------|--------------------|
| 0.5854295185578858 | 0.6919762395388901 | 0.6161112477589717 |
| 0.7419599096260339 | 0.4189098022449584 | 0.4905250732793353 |
| 0.5774864213171027 | 0.8864711085832980 | 0.4863891456451429 |
| 0.1094028020686757 | 0.2558269654842312 | 0.4941076101562610 |
| 0.2213089053669828 | 0.6292195023333125 | 0.4940818366016838 |
| 0.3679147176622996 | 0.1573215074904187 | 0.4946819028604300 |
| 0.8400663478128755 | 0.7745694711752223 | 0.4879166097081307 |
| 0.8091817556645583 | 0.1864322804117573 | 0.4900288767078766 |
| 0.1430109754805694 | 0.8543047148285002 | 0.4849624938033824 |
| 0.1688162549092990 | 0.0672191265176939 | 0.6853413387368584 |
| 0.4773193504261263 | 0.4737902584064542 | 0.7095646641738080 |
| 0.7228351741296389 | 0.8310646102086207 | 0.6269223684770668 |
| 0.4240285283332865 | 0.6400387475557064 | 0.5399162999907663 |
| 0.3655711985908269 | 0.3340257987661601 | 0.5756932839914233 |
| 0.6291017054014043 | 0.5491120309300326 | 0.5269219693175803 |

TS from 3\*CO-ppf to \*COCOCO

C15N8O3Cu3

1.0000000000000000

8.8479003899999995 0.0000000000000000 0.0000000000000000

-4.4239634600000004 7.6624988500000004 0.0000000000000000

0.0000000000000000 0.0000000000000000 19.5596008300000008

C N O Cu

15 8 3 3

Direct

|                    |                    |                    |
|--------------------|--------------------|--------------------|
| 0.7124498407367821 | 0.2318615424581588 | 0.4861419386097514 |
| 0.7770514709750330 | 0.9866674115869668 | 0.4851114034969365 |
| 0.0225360215544949 | 0.2968244865725677 | 0.4856262276607937 |
| 0.2969475586357083 | 0.7844326016124802 | 0.4816562088775306 |
| 0.2245954778316907 | 0.0189413110944944 | 0.4828211768961010 |
| 0.9901607572481916 | 0.7121995422600192 | 0.4820084336151033 |
| 0.5262006485363881 | 0.1002252327886318 | 0.4852495538833835 |
| 0.9088504958945365 | 0.9323195701672478 | 0.4843476498038759 |
| 0.0766186373248877 | 0.4827122148295054 | 0.4843507019243226 |
| 0.4806283510707433 | 0.9208069625121892 | 0.4829425318792572 |
| 0.0883453210831254 | 0.0664153024627636 | 0.4837156792981098 |
| 0.9428863255157705 | 0.5283601340506483 | 0.4832949784385533 |
| 0.3619760073271295 | 0.3743140058556179 | 0.6399179501048841 |
| 0.4921602611031395 | 0.6275300133571533 | 0.6398878744005284 |
| 0.6505892643364304 | 0.5413016301069282 | 0.6405333054149711 |
| 0.7688765338131643 | 0.4039345967456884 | 0.4871476679503237 |
| 0.6051236772233994 | 0.8709240874777300 | 0.4858322058276693 |
| 0.1380319732297020 | 0.2404451875388286 | 0.4867951223856334 |
| 0.2498033592060035 | 0.6141523238142871 | 0.4855963062177626 |

|                    |                    |                    |
|--------------------|--------------------|--------------------|
| 0.3951379913334491 | 0.1420441548483410 | 0.4875088587250267 |
| 0.8668127353700552 | 0.7592890826868629 | 0.4856529698165278 |
| 0.8370851711717682 | 0.1717565362794829 | 0.4851822822189593 |
| 0.1704871703064918 | 0.8386011650452011 | 0.4798031424972918 |
| 0.2634234482336070 | 0.2996203821690409 | 0.6850427908399261 |
| 0.4944207916222473 | 0.7204908339649575 | 0.6847434333885745 |
| 0.7391600916951464 | 0.5506366169967098 | 0.6874927911207386 |
| 0.4587143795152011 | 0.6411741034442815 | 0.5410483556913073 |
| 0.3693492563573863 | 0.3223266505352571 | 0.5443523099872473 |
| 0.6841964509028315 | 0.5481608148813397 | 0.5421624526114319 |

C<sub>3</sub> path

\*COCOCO

C15N8Cu3O3

1.0000000000000000

8.8479003905999996 0.0000000000000000 0.0000000000000000

-4.4239501952999998 7.6625065083999999 0.0000000000000000

0.0000000000000000 0.0000000000000000 19.5596008300999991

C N Cu O

15 8 3 3

Direct

|                    |                    |                    |
|--------------------|--------------------|--------------------|
| 0.6967512104207482 | 0.2221358969268586 | 0.4907397264795893 |
| 0.7613924414574849 | 0.9763832053865812 | 0.4897896037851838 |
| 0.0070034734955820 | 0.2866887011130015 | 0.4898701982582452 |
| 0.2826166993398329 | 0.7760886323754467 | 0.4877464480345999 |
| 0.2082667085980063 | 0.0086586843833224 | 0.4862000147752637 |
| 0.9759933975761201 | 0.7026516127082383 | 0.4848959924437649 |
| 0.5113386175896183 | 0.0918378924620935 | 0.4899340539885201 |
| 0.8926737652909114 | 0.9215129905746043 | 0.4867639563249991 |
| 0.0628368349455022 | 0.4733516362956193 | 0.4896394870967277 |
| 0.4647798885911467 | 0.9119848966705595 | 0.4892811187283939 |
| 0.0718122532183024 | 0.0554178112985562 | 0.4864764778790861 |
| 0.9294084318886902 | 0.5195219349991190 | 0.4877450732321045 |
| 0.4919046501560264 | 0.5213038424243474 | 0.6673898823136747 |
| 0.6308184518554196 | 0.6511889407629247 | 0.6186605993571533 |
| 0.3298103822982547 | 0.4341114840658831 | 0.6220460834064893 |
| 0.7550896657724833 | 0.3950424910284853 | 0.4921350285963405 |
| 0.5893446324498091 | 0.8622529448370206 | 0.4929162997997263 |
| 0.1207416406182436 | 0.2286635668934598 | 0.4899851150425089 |
| 0.2354311604825924 | 0.6054977862444615 | 0.4924939410121108 |
| 0.3788262799460029 | 0.1324900654720391 | 0.4916218180919319 |
| 0.8531332260693180 | 0.7497174311898627 | 0.4866011698916171 |
| 0.8219698840296663 | 0.1621612898817165 | 0.4889313478626987 |
| 0.1559047492785305 | 0.8292708765971754 | 0.4829627361685013 |

|                    |                    |                    |
|--------------------|--------------------|--------------------|
| 0.4491225302484583 | 0.6277287454775662 | 0.5426866438999164 |
| 0.3616957430084210 | 0.3238882423354815 | 0.5384544091174125 |
| 0.6588555781713807 | 0.5321351104002120 | 0.5365306867331793 |
| 0.5014927753728566 | 0.5089336883605280 | 0.7289624877214066 |
| 0.7668562537542979 | 0.7839295961437336 | 0.6331271838270970 |
| 0.1769888100762675 | 0.3609097636910919 | 0.6396523721317752 |

\*COCO HCO

C15Cu3H1N8O3

1.0000000000000000

8.8479003899999995 0.0000000000000000 0.0000000000000000

-4.4239502000000002 7.6625065100000000 0.0000000000000000

0.0000000000000000 0.0000000000000000 19.5596008300000008

H C N O Cu

1 15 8 3 3

Direct

|                    |                    |                    |
|--------------------|--------------------|--------------------|
| 0.4846944765730174 | 0.5069363775977971 | 0.7595702744965246 |
| 0.6994835885263136 | 0.2200081097200057 | 0.4921140808421554 |
| 0.7649921545904220 | 0.9754413765815834 | 0.4916337722049844 |
| 0.0099223196912898 | 0.2853667470164364 | 0.4904911250945501 |
| 0.2858344724513807 | 0.7751778712194179 | 0.4890615549347112 |
| 0.2109250020273095 | 0.0067701413697282 | 0.4871879336093684 |
| 0.9790426190592889 | 0.7009469176816815 | 0.4861998768424459 |
| 0.5148319234443285 | 0.0906498358302165 | 0.4911320242378757 |
| 0.8954353737974277 | 0.9199034284044996 | 0.4886331403819991 |
| 0.0659932075141850 | 0.4715397668485565 | 0.4904677077345521 |
| 0.4673946879717040 | 0.9104275125235544 | 0.4906862912428760 |
| 0.0747874546369383 | 0.0538461566368322 | 0.4875907267115307 |
| 0.9326071487494433 | 0.5182172631155400 | 0.4888267468423466 |
| 0.4770790872031359 | 0.5441198070011777 | 0.6622234726262400 |
| 0.6324553241740871 | 0.6360670103310208 | 0.6225104275048964 |
| 0.3283390312477577 | 0.4271442014775846 | 0.6227324688217259 |
| 0.7586781708042752 | 0.3936944136842711 | 0.4935636273687329 |
| 0.5922732499315125 | 0.8609908128465661 | 0.4951164718844616 |
| 0.1241438127140160 | 0.2271596448980478 | 0.4902366126693807 |
| 0.2383170466906784 | 0.6039195367711729 | 0.4936900395550075 |
| 0.3816051754613528 | 0.1306537299447030 | 0.4926281381566719 |
| 0.8553185307658792 | 0.7477886965453104 | 0.4883490558982768 |
| 0.8249477062102726 | 0.1603036028933136 | 0.4899169581818280 |
| 0.1585865022097393 | 0.8277258439870575 | 0.4839297654619256 |
| 0.4665062776812862 | 0.5840288779470986 | 0.7292105014586557 |
| 0.7805993995750973 | 0.7502890466596609 | 0.6383328136236728 |
| 0.1743022042777938 | 0.3343683681085764 | 0.6387808601290671 |
| 0.4521167103356847 | 0.6250698337542600 | 0.5417924808279024 |

|                    |                    |                    |
|--------------------|--------------------|--------------------|
| 0.3642668218621026 | 0.3227289033061045 | 0.5382289783652853 |
| 0.6603878398222784 | 0.5287909152982279 | 0.5374424622903534 |

\*COCCO

C15Cu3N8O2

|                     |                    |                     |
|---------------------|--------------------|---------------------|
| 1.00000000000000    |                    |                     |
| 8.8479003899999995  | 0.0000000000000000 | 0.0000000000000000  |
| -4.4239502000000002 | 7.6625065100000000 | 0.0000000000000000  |
| 0.0000000000000000  | 0.0000000000000000 | 19.5596008300000008 |
| C                   | N                  | O                   |
| 15                  | 8                  | 2                   |
|                     |                    | Cu                  |
|                     |                    | 3                   |

Direct

|                    |                    |                    |
|--------------------|--------------------|--------------------|
| 0.7111617462403637 | 0.2285383153540888 | 0.4881338883757707 |
| 0.7767504875813832 | 0.9838453471576127 | 0.4860102494060599 |
| 0.0219623346177516 | 0.2940771853506399 | 0.4856506726499843 |
| 0.2972056488064208 | 0.7833396249238267 | 0.4823369441291950 |
| 0.2221044325694044 | 0.0147494595998646 | 0.4819878164186944 |
| 0.9902524030643183 | 0.7088498788963448 | 0.4831765218191204 |
| 0.5262575950350820 | 0.0988585625456821 | 0.4860460768224368 |
| 0.9069665122680703 | 0.9280373085164090 | 0.4848866864929705 |
| 0.0776704736985336 | 0.4797080519441632 | 0.4849933325014972 |
| 0.4793530166868625 | 0.9189159432996445 | 0.4838579752804581 |
| 0.0867885024102494 | 0.0616858960826754 | 0.4829524234893185 |
| 0.9440492579734195 | 0.5266815730695047 | 0.4853390223624857 |
| 0.5675153200057231 | 0.5872398382559164 | 0.6166404495690962 |
| 0.6677161675277565 | 0.6813117017289327 | 0.6682580567490362 |
| 0.3842214695772185 | 0.4522577802230396 | 0.6162251163758216 |
| 0.7701995354396484 | 0.4018246158625535 | 0.4912023060871999 |
| 0.6040940392067887 | 0.8694620093874098 | 0.4873663339085620 |
| 0.1363053453226576 | 0.2358920785420325 | 0.4857166144664661 |
| 0.2501476923623369 | 0.6121904771551721 | 0.4866757472178455 |
| 0.3930445699887821 | 0.1383349528391490 | 0.4880392412187222 |
| 0.8666204130816902 | 0.7560002307664876 | 0.4873431898798520 |
| 0.8366912770285058 | 0.1689476949847143 | 0.4854828621054013 |
| 0.1697473294613632 | 0.8353269254081980 | 0.4786597825024020 |
| 0.7661228191178663 | 0.7619108314032074 | 0.7120214215277890 |
| 0.2638487083504578 | 0.4071987735590602 | 0.6570022189696080 |
| 0.4638581337809675 | 0.6363718340152994 | 0.5331691083356416 |
| 0.3700898078606796 | 0.3257208588829710 | 0.5328021718678957 |
| 0.6779652809357132 | 0.5346182202453941 | 0.5393989094706600 |

\*CHCOCO

C15Cu3H1N8O2

1.00000000000000

|                     |                    |                     |
|---------------------|--------------------|---------------------|
| 8.8479003899999995  | 0.0000000000000000 | 0.0000000000000000  |
| -4.4239502000000002 | 7.6625065100000000 | 0.0000000000000000  |
| 0.0000000000000000  | 0.0000000000000000 | 19.5596008300000008 |

|   |    |   |   |    |
|---|----|---|---|----|
| H | C  | N | O | Cu |
| 1 | 15 | 8 | 2 | 3  |

Direct

|                    |                    |                    |
|--------------------|--------------------|--------------------|
| 0.7135149709578874 | 0.7565626582997665 | 0.6296941006326254 |
| 0.7047964753979958 | 0.2246424793218525 | 0.4928685561764398 |
| 0.7692766508133324 | 0.9790391377688146 | 0.4902966422892219 |
| 0.0152128103723529 | 0.2897060745266358 | 0.4910891017420381 |
| 0.2900089729022778 | 0.7787370887203166 | 0.4874156120504421 |
| 0.2158274082386261 | 0.0108827276432182 | 0.4879644933958232 |
| 0.9833061092597501 | 0.7041326942555859 | 0.4883357202864820 |
| 0.5189399968423105 | 0.0945846477023943 | 0.4911344215165012 |
| 0.8997794651337466 | 0.9232693014666933 | 0.4897651344402427 |
| 0.0702586685722774 | 0.4750186373155762 | 0.4905312964575065 |
| 0.4731714097252817 | 0.9148635004440046 | 0.4883440986110587 |
| 0.0796916841334895 | 0.0572960706755825 | 0.4886525329862347 |
| 0.9372847762151219 | 0.5222189509949108 | 0.4903267122403436 |
| 0.4825065474794998 | 0.5283201597457322 | 0.6665978758051065 |
| 0.5998944065125061 | 0.6323898887909811 | 0.6134104948937148 |
| 0.3099171230239199 | 0.3984729945794071 | 0.6285431702861158 |
| 0.7627819150198086 | 0.3973694109349171 | 0.4957885656357136 |
| 0.5968779047179247 | 0.8652913703911410 | 0.4907428483376783 |
| 0.1286933629718129 | 0.2308021669363923 | 0.4914212264579508 |
| 0.2431958335069017 | 0.6082001122876636 | 0.4925142293647717 |
| 0.3867222726430484 | 0.1346279304348257 | 0.4935944104161447 |
| 0.8601094336128325 | 0.7512480608230234 | 0.4920242660744374 |
| 0.8294034064583865 | 0.1648207717311913 | 0.4902012419790832 |
| 0.1636126942016752 | 0.8313477628803499 | 0.4840780023823635 |
| 0.4891296966680842 | 0.5423676450786056 | 0.7289468419484514 |
| 0.1598961594333449 | 0.3296690309210362 | 0.6458935644714928 |
| 0.4492954122021763 | 0.6286959411156655 | 0.5407484427905924 |
| 0.3636117209045944 | 0.3234741029960043 | 0.5409990888097689 |
| 0.6649387920790336 | 0.5293053312177154 | 0.5411218375216693 |

\*CHCOHCO

C15Cu3H2N8O2

1.0000000000000000

|                     |                    |                     |
|---------------------|--------------------|---------------------|
| 8.8479003899999995  | 0.0000000000000000 | 0.0000000000000000  |
| -4.4239502000000002 | 7.6625065100000000 | 0.0000000000000000  |
| 0.0000000000000000  | 0.0000000000000000 | 19.5596008300000008 |

|   |    |   |   |    |
|---|----|---|---|----|
| H | C  | N | O | Cu |
| 2 | 15 | 8 | 2 | 3  |

Direct

|                    |                    |                    |
|--------------------|--------------------|--------------------|
| 0.7133681259800001 | 0.7618139773727484 | 0.6348165431861995 |
| 0.3304741553195621 | 0.5062370475731156 | 0.7379379981218798 |
| 0.7053182410678204 | 0.2216366688392909 | 0.4928103583403202 |
| 0.7703516916890657 | 0.9767095257896370 | 0.4886068424978747 |
| 0.0162689017990711 | 0.2867344440982167 | 0.4892220114411107 |
| 0.2915028717295350 | 0.7755795838529256 | 0.4868667349454217 |
| 0.2171932069570071 | 0.0081233875989253 | 0.4862563249214892 |
| 0.9839349497713257 | 0.7020277772676852 | 0.4861997792489569 |
| 0.5201541398283300 | 0.0912027936880358 | 0.4909547081529259 |
| 0.9019182276476998 | 0.9213215388510335 | 0.4868770224429549 |
| 0.0713470092393846 | 0.4728231855223279 | 0.4891861370632694 |
| 0.4740059669191392 | 0.9114763890571043 | 0.4880692617460602 |
| 0.0813255421745333 | 0.0553777806933913 | 0.4862338884467182 |
| 0.9377213861422692 | 0.5194447123239395 | 0.4894264531494583 |
| 0.4676233829645416 | 0.5429860133461304 | 0.6600343072176700 |
| 0.6082044139100662 | 0.6345293702579389 | 0.6169337148299610 |
| 0.3169634745255165 | 0.3814769399694222 | 0.6326797107780884 |
| 0.7635444903348654 | 0.3946994273930596 | 0.4961527991982186 |
| 0.5985009189809152 | 0.8617955415800522 | 0.4900874915135760 |
| 0.1310394180209367 | 0.2297179330342749 | 0.4889465014092553 |
| 0.2442853869334067 | 0.6045654750574155 | 0.4915507592595926 |
| 0.3873433222818517 | 0.1312348440903637 | 0.4936051268723688 |
| 0.8606372704490776 | 0.7491078608258180 | 0.4881996962620574 |
| 0.8303976882938942 | 0.1617927978469541 | 0.4891431783385567 |
| 0.1643317039856955 | 0.8282830275638531 | 0.4827259268223787 |
| 0.4499899379335435 | 0.5930348895349750 | 0.7233876766758954 |
| 0.1775088161642311 | 0.3094032638876138 | 0.6646932713832876 |
| 0.4544478213596216 | 0.6238091219810707 | 0.5396178205804865 |
| 0.3572195268479940 | 0.3092149213264371 | 0.5454171871952944 |
| 0.6678954607490918 | 0.5245790397762449 | 0.5448598479586595 |

\*CHCOHCHO

C15Cu3H3N8O2

1.0000000000000000

8.8479003899999995 0.0000000000000000 0.0000000000000000

-4.4239502000000002 7.6625065100000000 0.0000000000000000

0.0000000000000000 0.0000000000000000 19.5596008300000008

| H | C  | N | O | Cu |
|---|----|---|---|----|
| 3 | 15 | 8 | 2 | 3  |

Direct

|                    |                    |                    |
|--------------------|--------------------|--------------------|
| 0.6998566764820390 | 0.7413903739852232 | 0.6275565952204358 |
| 0.3751339699640509 | 0.5371137576078064 | 0.7532206987584514 |
| 0.2830713055039168 | 0.2952260835153602 | 0.6129176363798980 |

|                    |                    |                    |
|--------------------|--------------------|--------------------|
| 0.7006512993784578 | 0.2226952907672708 | 0.4881259657690047 |
| 0.7664672009863656 | 0.9778290158231272 | 0.4882619812990080 |
| 0.0102530525098286 | 0.2883237908286750 | 0.4853804786816222 |
| 0.2871149242563617 | 0.7773988715491571 | 0.4855497048899206 |
| 0.2128410541892397 | 0.0099098696298760 | 0.4814352733007772 |
| 0.9796170632203129 | 0.7043839291116949 | 0.4857444536365609 |
| 0.5160954961429038 | 0.0925850202884691 | 0.4847685514842953 |
| 0.8974614796006304 | 0.9234753718239995 | 0.4867379501931984 |
| 0.0663702640976344 | 0.4747841927394839 | 0.4870960777914184 |
| 0.4697697053453940 | 0.9123957414534031 | 0.4864004918131527 |
| 0.0772197843272079 | 0.0568357805252447 | 0.4826869509499020 |
| 0.9327081661100015 | 0.5209547672935531 | 0.4873090479461151 |
| 0.4637775900953789 | 0.5410307311187001 | 0.6660905724344180 |
| 0.5853203333922083 | 0.6145324046728834 | 0.6143689319939614 |
| 0.3018994677486484 | 0.3706561709606186 | 0.6607329341178410 |
| 0.7589838903518236 | 0.3960316307872373 | 0.4922643940970725 |
| 0.5941430530741465 | 0.8639400914174471 | 0.4911972650855217 |
| 0.1246674159294521 | 0.2309658608348756 | 0.4827886600639197 |
| 0.2392351511553819 | 0.6060815546614765 | 0.4904593968922183 |
| 0.3842633999366562 | 0.1324209528692042 | 0.4820434837201588 |
| 0.8572564384119340 | 0.7513422728686044 | 0.4889271107743094 |
| 0.8263523597376932 | 0.1639613935791139 | 0.4858633236754655 |
| 0.1598483494214672 | 0.8294548720606993 | 0.4817443258430298 |
| 0.4816619124757990 | 0.6190125758403048 | 0.7273611719848150 |
| 0.1959259349130247 | 0.3168110773613820 | 0.7083498973283816 |
| 0.4471955451130516 | 0.6234579843161920 | 0.5383704833849756 |
| 0.3790838406444713 | 0.3497486463917936 | 0.4941588195421758 |
| 0.6568934254845123 | 0.5154642533171365 | 0.5427718809479744 |

\*CHCCHO

C15Cu3H2N8O1

1.0000000000000000

8.8479003899999995 0.0000000000000000 0.0000000000000000

-4.4239502000000002 7.6625065100000000 0.0000000000000000

0.0000000000000000 0.0000000000000000 19.5596008300000008

H C N O Cu

2 15 8 1 3

Direct

|                    |                    |                    |
|--------------------|--------------------|--------------------|
| 0.6252069483063705 | 0.7003873435387946 | 0.6550275776543962 |
| 0.5372720293376981 | 0.3894282981935301 | 0.7251134322647658 |
| 0.6902025571750016 | 0.2280738301248759 | 0.4894223780042012 |
| 0.7547102783940326 | 0.9820911746426746 | 0.4894006604129359 |
| 0.0004988240604655 | 0.2931204428454938 | 0.4908429415448583 |
| 0.2758300011910039 | 0.7824418632040333 | 0.4857953821768605 |

|                    |                    |                    |
|--------------------|--------------------|--------------------|
| 0.2015256471022567 | 0.0141323123708268 | 0.4852377395328314 |
| 0.9695701742264691 | 0.7072700624974209 | 0.4856459695517755 |
| 0.5042097687003985 | 0.0977517883926195 | 0.4878654596967972 |
| 0.8849127481055805 | 0.9265875823602678 | 0.4880625864445804 |
| 0.0560221078850465 | 0.4782651452615840 | 0.4892717385918861 |
| 0.4582558222711418 | 0.9181068409049108 | 0.4871884778474144 |
| 0.0653779904692426 | 0.0601238537799931 | 0.4872142562270539 |
| 0.9230996932130209 | 0.5254435688644650 | 0.4873367770029911 |
| 0.4944579381778993 | 0.4259154315846724 | 0.6183345467146629 |
| 0.5477215766707701 | 0.6005640347838492 | 0.6164723829349279 |
| 0.5132420924045940 | 0.3239961200818113 | 0.6739367819557325 |
| 0.7486367913801022 | 0.4008459601406520 | 0.4915117025234035 |
| 0.5823077271172072 | 0.8680137471200712 | 0.4907000701425515 |
| 0.1144646655309174 | 0.2338382546436593 | 0.4932374143411501 |
| 0.2287706411077960 | 0.6117092164556164 | 0.4918980527994934 |
| 0.3723510043106387 | 0.1384198979434658 | 0.4890402077083154 |
| 0.8453665256874699 | 0.7541079114262288 | 0.4902408249597460 |
| 0.8152657299063367 | 0.1681260774966333 | 0.4884946780835089 |
| 0.1490550340472939 | 0.8347449491262722 | 0.4816956901252195 |
| 0.4999917841613774 | 0.1794916005545424 | 0.6687838341456956 |
| 0.4339679566534700 | 0.6331516768108729 | 0.5397779062378936 |
| 0.3416662112498837 | 0.3252979287796698 | 0.5401750841816023 |
| 0.6587306211565408 | 0.5417369960705030 | 0.5384784761927621 |

\*CH<sub>2</sub>CCHO

C15Cu3H3N8O1

1.0000000000000000

8.8479003899999995 0.0000000000000000 0.0000000000000000

-4.4239502000000002 7.6625065100000000 0.0000000000000000

0.0000000000000000 0.0000000000000000 19.5596008300000008

H C N O Cu

3 15 8 1 3

Direct

|                    |                    |                    |
|--------------------|--------------------|--------------------|
| 0.6615204041580878 | 0.6539768759258859 | 0.6855710179956112 |
| 0.5815573753409080 | 0.3769993101726842 | 0.7158985131582193 |
| 0.5371673060954965 | 0.7045757302691146 | 0.6226201909122805 |
| 0.6800386755301212 | 0.2237545446438029 | 0.4932503172368578 |
| 0.7473051338446991 | 0.9798933412528670 | 0.4893851686829981 |
| 0.9911841864983845 | 0.2894268820936973 | 0.4911814940634894 |
| 0.2668939797917503 | 0.7771128362836546 | 0.4854902745438401 |
| 0.1946353202062764 | 0.0105702894221784 | 0.4893181134162802 |
| 0.9604089827175646 | 0.7034798199153344 | 0.4897754516282087 |
| 0.4952017894737767 | 0.0925509686278123 | 0.4910694755792730 |
| 0.8782055891814745 | 0.9241687847919132 | 0.4907678478655814 |

|                    |                    |                    |
|--------------------|--------------------|--------------------|
| 0.0455599875421826 | 0.4738444522033301 | 0.4882103059894025 |
| 0.4490977216325759 | 0.9126026066905036 | 0.4870939083099093 |
| 0.0577786842199215 | 0.0577148643885542 | 0.4901802201423649 |
| 0.9120717077256801 | 0.5208016561712607 | 0.4910804757046603 |
| 0.4845230672275285 | 0.4353259422478392 | 0.6220867698649680 |
| 0.5717899747513562 | 0.6100321205780286 | 0.6417197758372885 |
| 0.5185481893828090 | 0.3174694024653607 | 0.6655166594216102 |
| 0.7388536450553987 | 0.3966726276082385 | 0.4974470940626513 |
| 0.5755937133206801 | 0.8645698715355195 | 0.4870760922676418 |
| 0.1065762389784213 | 0.2311465333026159 | 0.4943145841851722 |
| 0.2174709966574358 | 0.6053874399713933 | 0.4851728785113589 |
| 0.3635437805733819 | 0.1331596347569048 | 0.4925621757125012 |
| 0.8371393652722348 | 0.7517186223299169 | 0.4945059474429944 |
| 0.8063893580769027 | 0.1637848943866149 | 0.4898834850574061 |
| 0.1397496514837055 | 0.8305298925259749 | 0.4858935684229630 |
| 0.4802315904393282 | 0.1667869416700434 | 0.6522575300543284 |
| 0.4404189833257987 | 0.6067888745481121 | 0.4917254330629433 |
| 0.3268004648693603 | 0.3306839187440555 | 0.5467024853734236 |
| 0.6502482866267800 | 0.5469576804767958 | 0.5455076554938232 |

\*CH<sub>2</sub>CHCHO

C15Cu3H4N8O1

1.0000000000000000

8.8479003899999995 0.0000000000000000 0.0000000000000000

-4.4239502000000002 7.6625065100000000 0.0000000000000000

0.0000000000000000 0.0000000000000000 19.5596008300000008

H C N O Cu

4 15 8 1 3

Direct

|                    |                    |                    |
|--------------------|--------------------|--------------------|
| 0.5570142779487819 | 0.7329921273652960 | 0.6160494241960628 |
| 0.3429269453633177 | 0.3292746413884032 | 0.7480141716533221 |
| 0.7430681937339696 | 0.7198273531970638 | 0.6257035151325087 |
| 0.5940404650577128 | 0.6079845903162090 | 0.7332234074799341 |
| 0.7124191066444685 | 0.2292201246536382 | 0.4929198115052360 |
| 0.7775069079679102 | 0.9840652293525942 | 0.4876899707531361 |
| 0.0234238301482035 | 0.2940988709960716 | 0.4915461832508824 |
| 0.2992807633795166 | 0.7831510996831799 | 0.4870714930827288 |
| 0.2258737866185375 | 0.0167695285008608 | 0.4877506556240078 |
| 0.9913384527088476 | 0.7102047237407562 | 0.4866777295149461 |
| 0.5275019636539454 | 0.0985560435824689 | 0.4912549231252541 |
| 0.9099739061529099 | 0.9295393330918192 | 0.4867468427079058 |
| 0.0783870415819287 | 0.4807551779593406 | 0.4906957093800847 |
| 0.4816622538141641 | 0.9187327778121868 | 0.4873627226508075 |
| 0.0890588500753602 | 0.0638072999346396 | 0.4880652802399378 |

|                    |                    |                    |
|--------------------|--------------------|--------------------|
| 0.9448031076432404 | 0.5266554360168620 | 0.4903199525137096 |
| 0.5291263420280944 | 0.5373090700454350 | 0.6865055344014843 |
| 0.5995655927080183 | 0.6320958366778783 | 0.6210504305575242 |
| 0.3860204148378327 | 0.3741883140363851 | 0.6952057207819053 |
| 0.7710214939294958 | 0.4022398614303405 | 0.4966625746969617 |
| 0.6065881801690898 | 0.8695115266486693 | 0.4876253790316650 |
| 0.1381725281628482 | 0.2374689649542775 | 0.4931965395466455 |
| 0.2510773197968315 | 0.6117429629806023 | 0.4921129796973072 |
| 0.3951405402262333 | 0.1391332576739493 | 0.4943374883215721 |
| 0.8684535120203331 | 0.7569716566573489 | 0.4879585941952033 |
| 0.8382567314204885 | 0.1697681373966995 | 0.4893158224566284 |
| 0.1718765788711123 | 0.8361400048811765 | 0.4835751124441776 |
| 0.2927285372894768 | 0.2633394690991177 | 0.6474572372570800 |
| 0.4557577169888288 | 0.6154731681806702 | 0.5333136816787774 |
| 0.3596439729528811 | 0.3105510879951095 | 0.5533456140212643 |
| 0.6652664561056223 | 0.5263247437509510 | 0.5421289181013300 |

\*CH<sub>2</sub>CHCHOH

C15Cu3H5N8O1

1.0000000000000000

8.8479003899999995 0.0000000000000000 0.0000000000000000

-4.4239502000000002 7.6625065100000000 0.0000000000000000

0.0000000000000000 0.0000000000000000 19.5596008300000008

H C N O Cu

5 15 8 1 3

Direct

|                    |                    |                    |
|--------------------|--------------------|--------------------|
| 0.5874405218129873 | 0.7529169746487895 | 0.6228964112371128 |
| 0.3454781821148999 | 0.3256245756570546 | 0.7518064902273985 |
| 0.7389953835034864 | 0.6874891564519712 | 0.6257078623075319 |
| 0.5693420939351695 | 0.6137381372259622 | 0.7344806595203468 |
| 0.2026876403841169 | 0.1478805381514791 | 0.6676215506320694 |
| 0.7110178857173183 | 0.2286309243142526 | 0.4922957825240853 |
| 0.7765074171482268 | 0.9837003227376302 | 0.4884808418678266 |
| 0.0214573078639020 | 0.2939487419697701 | 0.4911906852077660 |
| 0.2975022225626858 | 0.7824769269234625 | 0.4870126442483228 |
| 0.2234589708879617 | 0.0148540163871890 | 0.4870637676084001 |
| 0.9898244773912087 | 0.7086846392600414 | 0.4867841385939718 |
| 0.5262364550824923 | 0.0978131704797675 | 0.4903001788769975 |
| 0.9075616835576927 | 0.9283477897138785 | 0.4874884753459266 |
| 0.0767062520969075 | 0.4794411279983513 | 0.4905171498603850 |
| 0.4802181793971044 | 0.9177677328662155 | 0.4874226232721407 |
| 0.0874642414768368 | 0.0623598455845981 | 0.4877380612595711 |
| 0.9431167919025520 | 0.5262633697254492 | 0.4899173599656651 |
| 0.5159379509234856 | 0.5361715874286594 | 0.6878151671142535 |

|                    |                    |                    |
|--------------------|--------------------|--------------------|
| 0.5942020603056192 | 0.6297632834167390 | 0.6220034385507983 |
| 0.3885068669968553 | 0.3727740677682068 | 0.6998663955699425 |
| 0.7692574925387198 | 0.4016296590784658 | 0.4959377916742026 |
| 0.6049321254686514 | 0.8689958783165386 | 0.4889717226871022 |
| 0.1354779047238412 | 0.2355555586424332 | 0.4924464765692420 |
| 0.2495690119964459 | 0.6115336101116744 | 0.4925971811708758 |
| 0.3936563958422847 | 0.1370646869046779 | 0.4925884554081038 |
| 0.8670347824872499 | 0.7563518992752611 | 0.4892629206326040 |
| 0.8365607298473762 | 0.1692167620946069 | 0.4890915126659039 |
| 0.1703019123761048 | 0.8349837517960664 | 0.4830191760259913 |
| 0.3041206651298210 | 0.2500949739929025 | 0.6488873948655894 |
| 0.4551925658971645 | 0.6237368096617570 | 0.5374053939841956 |
| 0.3716652915808984 | 0.3296545080550077 | 0.5346190662022151 |
| 0.6685156070499544 | 0.5345541733611379 | 0.5396530743234652 |

\*CH<sub>2</sub>CHCH

C15Cu3H4N8

1.0000000000000000

8.8479003899999995 0.0000000000000000 0.0000000000000000

-4.4239502000000002 7.6625065100000000 0.0000000000000000

0.0000000000000000 0.0000000000000000 19.5596008300000008

H C N Cu

4 15 8 3

Direct

|                    |                    |                    |
|--------------------|--------------------|--------------------|
| 0.6215529638770388 | 0.7814102135897795 | 0.6303852437615527 |
| 0.3005195353318720 | 0.2642669791578435 | 0.6939880476936259 |
| 0.7606501235309414 | 0.6976307963896833 | 0.6302440937343785 |
| 0.5307071031390572 | 0.5582769411959789 | 0.7302691736365305 |
| 0.7125833650715141 | 0.2331313615765456 | 0.4960075683610498 |
| 0.7773308212228089 | 0.9881141912431559 | 0.4906291675341501 |
| 0.0236583436129926 | 0.2981935528712537 | 0.4960075636167088 |
| 0.2988425819415344 | 0.7866638612894569 | 0.4919636841592612 |
| 0.2252979924288261 | 0.0201021620329725 | 0.4907518757416556 |
| 0.9913040879114347 | 0.7136084267835086 | 0.4891439426712973 |
| 0.5269422058136648 | 0.1018645259193381 | 0.4944380707861394 |
| 0.9096875742926188 | 0.9335306796742520 | 0.4890265552278784 |
| 0.0781037985412492 | 0.4841997160628891 | 0.4956688867988977 |
| 0.4816533836476586 | 0.9223159921645107 | 0.4915315698332435 |
| 0.0891025059662624 | 0.0675481274931093 | 0.4917101915540347 |
| 0.9445090676685005 | 0.5306681347764519 | 0.4934468602156675 |
| 0.5071397160360479 | 0.5213063820448489 | 0.6758716235425488 |
| 0.6197705530977465 | 0.6556417687306451 | 0.6239254777405951 |
| 0.3829754601179750 | 0.3618719735516321 | 0.6556584284484981 |
| 0.7700763997407908 | 0.4058836630376875 | 0.4988139386776388 |

|                    |                    |                    |
|--------------------|--------------------|--------------------|
| 0.6062893138838855 | 0.8729339260811817 | 0.4909724006183547 |
| 0.1384019785524627 | 0.2412118616279423 | 0.4982122175766416 |
| 0.2508432447766383 | 0.6157672505239900 | 0.4982826498780059 |
| 0.3950373776983806 | 0.1428150163669968 | 0.4973979158630159 |
| 0.8680930984459623 | 0.7609717725834795 | 0.4889713455388180 |
| 0.8378425364105782 | 0.1737681051719886 | 0.4931433821273666 |
| 0.1717823267625532 | 0.8397928576535919 | 0.4870605045120530 |
| 0.4549428151519624 | 0.6230148591094398 | 0.5428512856160401 |
| 0.3612406028671007 | 0.3109260773626273 | 0.5599773295484932 |
| 0.6661696424599389 | 0.5377651039332314 | 0.5400748249858419 |

\*CH<sub>3</sub>CHCHOH

C15Cu3H6N8O1

1.0000000000000000

|                     |                    |                     |
|---------------------|--------------------|---------------------|
| 8.8479003899999995  | 0.0000000000000000 | 0.0000000000000000  |
| -4.4239502000000002 | 7.6625065100000000 | 0.0000000000000000  |
| 0.0000000000000000  | 0.0000000000000000 | 19.5596008300000008 |

| H | C  | N | O | Cu |
|---|----|---|---|----|
| 6 | 15 | 8 | 1 | 3  |

Direct

|                    |                    |                    |
|--------------------|--------------------|--------------------|
| 0.7378988634408254 | 0.8410883951480478 | 0.6446090173084308 |
| 0.6031863218501651 | 0.3693364787522083 | 0.6591361353769786 |
| 0.8006463758167388 | 0.6933707040764967 | 0.6782852113255170 |
| 0.6582179812948549 | 0.7424775464321729 | 0.7250438613582932 |
| 0.3290202306421199 | 0.1742366974611763 | 0.6063471982518299 |
| 0.4199959711142063 | 0.5841950628834587 | 0.6323373751637533 |
| 0.6656809947790863 | 0.2038371782215439 | 0.5054715846513890 |
| 0.7331436761966694 | 0.9619514735046226 | 0.5008857228411455 |
| 0.9761767749004097 | 0.2702649102574924 | 0.4979927874517846 |
| 0.2505800883915691 | 0.7574688732523547 | 0.4987275840767993 |
| 0.1756212047846915 | 0.9886328422794392 | 0.5024439583402718 |
| 0.9429076292468790 | 0.6832161413935562 | 0.5031492229995574 |
| 0.4811335947750578 | 0.0727158767117183 | 0.5039354336361785 |
| 0.8613155804013943 | 0.9045712132217684 | 0.5033392856707427 |
| 0.0304435294078543 | 0.4549785792857636 | 0.4975763139445340 |
| 0.4337790540258104 | 0.8933700227733810 | 0.5005391583184087 |
| 0.0416954364264117 | 0.0378244921484303 | 0.5007414411184655 |
| 0.8962706832578811 | 0.5015337861829646 | 0.5029801351424666 |
| 0.5339778413702951 | 0.5688144265873568 | 0.6405828046963324 |
| 0.6917433548822450 | 0.7190947066433718 | 0.6732697876199558 |
| 0.5025034615095980 | 0.3986861631562105 | 0.6413454484017568 |
| 0.7229525490758086 | 0.3768232217636889 | 0.5096335226078408 |
| 0.5607868123948905 | 0.8480859734524312 | 0.4985761797718100 |
| 0.0897457741706682 | 0.2108922379333458 | 0.4960750188387582 |

|                    |                    |                    |
|--------------------|--------------------|--------------------|
| 0.2026995039557730 | 0.5863453964327731 | 0.4955898369979566 |
| 0.3485233705499271 | 0.1116910771111945 | 0.5043675452405477 |
| 0.8195817782188850 | 0.7317705549786581 | 0.5078006988561697 |
| 0.7917693184701209 | 0.1459172779322960 | 0.5009212625856263 |
| 0.1228414712046770 | 0.8098287125817407 | 0.5000469021279978 |
| 0.3342269033514185 | 0.2597721538062180 | 0.6396557787255045 |
| 0.4366878371972152 | 0.6047477705598009 | 0.4741032790710217 |
| 0.3461320428462137 | 0.3190315576189828 | 0.4733870548260369 |
| 0.6082805300496344 | 0.5120761754553443 | 0.5464097926561226 |

\*CH<sub>2</sub>CHCH<sub>2</sub>

C15Cu3H5N8

1.0000000000000000

8.8479003899999995 0.0000000000000000 0.0000000000000000

-4.4239502000000002 7.6625065100000000 0.0000000000000000

0.0000000000000000 0.0000000000000000 19.5596008300000008

H C N Cu

5 15 8 3

Direct

|                    |                    |                    |
|--------------------|--------------------|--------------------|
| 0.5902998040075161 | 0.7452143564676593 | 0.6363963632745844 |
| 0.2825012611371684 | 0.2812329768230070 | 0.7313255647233211 |
| 0.7370234881023673 | 0.6736383795030066 | 0.6336807695002943 |
| 0.5736669676374987 | 0.5318499305036889 | 0.7336149123535514 |
| 0.2604607122453193 | 0.3184536641898175 | 0.6385370745653535 |
| 0.7158219247635026 | 0.2388410469728905 | 0.4936803270622026 |
| 0.7810579396854447 | 0.9933011986829970 | 0.4921678186282697 |
| 0.0255715521829878 | 0.3038932211621028 | 0.4924664691017256 |
| 0.3021373350030737 | 0.7924641249405076 | 0.4907717528344365 |
| 0.2274942192928288 | 0.0247355920476990 | 0.4880635247606347 |
| 0.9948324016153767 | 0.7189801847932071 | 0.4899312238675199 |
| 0.5309233398279680 | 0.1080912365058236 | 0.4912536621641463 |
| 0.9117727312940180 | 0.9383234207639466 | 0.4907841768364400 |
| 0.0817945002119561 | 0.4898906335508262 | 0.4932085919086019 |
| 0.4848676099011783 | 0.9279489830079566 | 0.4911020880535669 |
| 0.0916106548156967 | 0.0716295802810681 | 0.4891284569403113 |
| 0.9481402766378563 | 0.5362801968005851 | 0.4922394872650058 |
| 0.5000012451688137 | 0.4983147645207972 | 0.6854118303214584 |
| 0.5933425318381894 | 0.6215942394136496 | 0.6275464395000100 |
| 0.3395455398354662 | 0.3588257359973544 | 0.6852119109271870 |
| 0.7742206383074083 | 0.4119190330106239 | 0.4971926219274792 |
| 0.6090677884692673 | 0.8791450410266349 | 0.4942061975555178 |
| 0.1391489879028332 | 0.2453302278068500 | 0.4921439888078502 |
| 0.2548249231844404 | 0.6217695400036156 | 0.4965822697696417 |
| 0.3985607697119691 | 0.1473191343220769 | 0.4910623864306981 |

|                    |                    |                    |
|--------------------|--------------------|--------------------|
| 0.8720312218331048 | 0.7662679981116716 | 0.4927845667981853 |
| 0.8411221535872495 | 0.1795253129020204 | 0.4911553958300455 |
| 0.1749468922985740 | 0.8445691875615338 | 0.4862088123556749 |
| 0.4631988278548245 | 0.6377447449738501 | 0.5441459117464199 |
| 0.3871956157958452 | 0.3555135595690591 | 0.5153967037260144 |
| 0.6753813758502545 | 0.5456205237834663 | 0.5430729004638460 |

\*CH<sub>3</sub>CH<sub>2</sub>CHOH

C<sub>15</sub>Cu<sub>3</sub>H<sub>7</sub>N<sub>8</sub>O<sub>1</sub>

1.0000000000000000

8.8479003899999995 0.0000000000000000 0.0000000000000000

-4.4239502000000002 7.6625065100000000 0.0000000000000000

0.0000000000000000 0.0000000000000000 19.5596008300000008

H C N O Cu

7 15 8 1 3

Direct

|                    |                     |                    |
|--------------------|---------------------|--------------------|
| 0.5898214648678551 | 0.7779840653892959  | 0.6936764833939982 |
| 0.3361790796962855 | 0.5503037372150824  | 0.6324229259981218 |
| 0.7269597541291629 | 0.7470295553663110  | 0.6353843146079887 |
| 0.4597466307296721 | 0.4688350507325708  | 0.7335942703510110 |
| 0.1367488593047988 | 0.2660326424179964  | 0.6231381808241591 |
| 0.7541429094142702 | 0.7368344773855122  | 0.7250569633533307 |
| 0.5960423703422316 | 0.4342837053233292  | 0.6771508330263434 |
| 0.7040039737231574 | 0.2051692104638854  | 0.4906204975793181 |
| 0.7684167166482014 | 0.9597012636566724  | 0.4918310914538206 |
| 0.0141738386870255 | 0.2711947235508211  | 0.4918203033124169 |
| 0.2880425311384612 | 0.7598424308510809  | 0.4900965784285118 |
| 0.2151103311070633 | -0.0061760988435947 | 0.4914571838350352 |
| 0.9829218808472772 | 0.6864129967296186  | 0.4856697033270475 |
| 0.5179390457031409 | 0.0754111252084339  | 0.4931152574823940 |
| 0.8995714896923841 | 0.9064703120846030  | 0.4888530210699958 |
| 0.0686386764337389 | 0.4567817201130153  | 0.4901373263475916 |
| 0.4714824193162903 | 0.8953959227707198  | 0.4918642392862742 |
| 0.0802038699987310 | 0.0414212254707375  | 0.4909372731905839 |
| 0.9359214714100215 | 0.5035063223305549  | 0.4868711903274845 |
| 0.5267289399152224 | 0.5076302488294350  | 0.6836488383906761 |
| 0.6569465309615017 | 0.7035092226057162  | 0.6843636971459079 |
| 0.3862433431589011 | 0.4565954208736643  | 0.6290225157649258 |
| 0.7622491204575775 | 0.3771247185831366  | 0.4882691208965220 |
| 0.5951860215022606 | 0.8452842520710442  | 0.4953641323318002 |
| 0.1285428017239959 | 0.2139315829097811  | 0.4945376332053754 |
| 0.2405732429304761 | 0.5894716511155520  | 0.4924000963063728 |
| 0.3864518896522537 | 0.1164985728351901  | 0.4978968854558996 |
| 0.8601575184686585 | 0.7348297621777272  | 0.4860538420205981 |

|                    |                    |                    |
|--------------------|--------------------|--------------------|
| 0.8276644896642346 | 0.1448619777184829 | 0.4901753140771475 |
| 0.1630737755183946 | 0.8143343585716422 | 0.4867185617544348 |
| 0.2405474341214622 | 0.2832618580000483 | 0.6475649270244764 |
| 0.4547356940324465 | 0.6019334954465957 | 0.5363815191260931 |
| 0.3843804087498958 | 0.3091112307096237 | 0.5475882036039462 |
| 0.6450935159529400 | 0.5130411893357082 | 0.5000643657003532 |

CH<sub>3</sub>CHCH<sub>2</sub>

C15Cu3H6N8

|                     |                    |                     |
|---------------------|--------------------|---------------------|
| 1.0000000000000000  |                    |                     |
| 8.8479003899999995  | 0.0000000000000000 | 0.0000000000000000  |
| -4.4239502000000002 | 7.6625065100000000 | 0.0000000000000000  |
| 0.0000000000000000  | 0.0000000000000000 | 19.5596008300000008 |

|   |    |   |    |
|---|----|---|----|
| H | C  | N | Cu |
| 6 | 15 | 8 | 3  |

Direct

|                    |                    |                    |
|--------------------|--------------------|--------------------|
| 0.5859651864824039 | 0.6971199312203387 | 0.6526873852373661 |
| 0.2805156794184891 | 0.2713660049853580 | 0.7370765075781474 |
| 0.7686581657452053 | 0.6843772320010539 | 0.6833935045759461 |
| 0.5755892056985031 | 0.4728914212469393 | 0.7770924111021550 |
| 0.3081755631500729 | 0.4227202093996800 | 0.6655300887855291 |
| 0.6814982161545621 | 0.7873436906914565 | 0.7341331395892946 |
| 0.7101940136656654 | 0.2328901284302403 | 0.4776141318697832 |
| 0.7746293040816231 | 0.9875578779168582 | 0.4773221021062318 |
| 0.0201086385466721 | 0.2973845015498338 | 0.4777232464082651 |
| 0.2954231029693503 | 0.7883415030622022 | 0.4748604467899248 |
| 0.2194118731909461 | 0.0174921411531515 | 0.4748835033748401 |
| 0.9901754759860086 | 0.7121738467829321 | 0.4748132752851386 |
| 0.5241170106027913 | 0.1041183215476696 | 0.4767825065543065 |
| 0.9035342833243375 | 0.9302814932499112 | 0.4767094238965517 |
| 0.0773258757790188 | 0.4834725135484903 | 0.4768188425625095 |
| 0.4775445445871155 | 0.9247525446010834 | 0.4756202408827116 |
| 0.0829466281618548 | 0.0632267243272575 | 0.4759546810986037 |
| 0.9444498061107773 | 0.5299975846563053 | 0.4757635254737189 |
| 0.5244356887593135 | 0.5064145528184064 | 0.7320843142165526 |
| 0.6453500871414944 | 0.6774282032605643 | 0.6987522840517554 |
| 0.3626594135001410 | 0.3944820462625934 | 0.7106843579595691 |
| 0.7717296614828274 | 0.4058891056319021 | 0.4787987658863334 |
| 0.6016349087181774 | 0.8759655806348455 | 0.4785953703640762 |
| 0.1316265073625596 | 0.2359668654204347 | 0.4791637621493299 |
| 0.2487140334428393 | 0.6176829209632161 | 0.4778601986712465 |
| 0.3899931066202647 | 0.1413838840526204 | 0.4782878274718984 |
| 0.8662168591704430 | 0.7588479541844434 | 0.4777678613892247 |
| 0.8349966784885273 | 0.1725722038173262 | 0.4762944949563370 |

|                    |                    |                    |
|--------------------|--------------------|--------------------|
| 0.1683379701153824 | 0.8393961345346536 | 0.4727099860455730 |
| 0.4658009373184939 | 0.6290032510662289 | 0.5053182261066881 |
| 0.3778223879107993 | 0.3462524798619170 | 0.5073627588670726 |
| 0.6605545163133553 | 0.5411974471200833 | 0.5058757886933237 |

CH<sub>3</sub>CH<sub>2</sub>CH<sub>2</sub>OH

C15Cu3H8N8O1

1.0000000000000000

|                     |                    |                     |
|---------------------|--------------------|---------------------|
| 8.8479003899999995  | 0.0000000000000000 | 0.0000000000000000  |
| -4.4239502000000002 | 7.6625065100000000 | 0.0000000000000000  |
| 0.0000000000000000  | 0.0000000000000000 | 19.5596008300000008 |

|   |    |   |   |    |
|---|----|---|---|----|
| H | C  | N | O | Cu |
| 8 | 15 | 8 | 1 | 3  |

Direct

|                    |                    |                    |
|--------------------|--------------------|--------------------|
| 0.4772750001626219 | 0.6168541390844579 | 0.7395105185733298 |
| 0.2862409893266348 | 0.3256314955108567 | 0.6397038856397087 |
| 0.5803001221890044 | 0.5964530071299171 | 0.6647337284907855 |
| 0.4379357050373514 | 0.3206689930857272 | 0.7801015829035214 |
| 0.0757573356038488 | 0.0377991332508255 | 0.6804642103308198 |
| 0.6773774695590672 | 0.6165307836948656 | 0.7464372509552731 |
| 0.5255927633419876 | 0.3041591441394307 | 0.7009619888293589 |
| 0.1889081214226103 | 0.3163107441763488 | 0.7209924938998581 |
| 0.7126925595222441 | 0.2197365317447446 | 0.4869318037836809 |
| 0.7769415107375176 | 0.9744172071392180 | 0.4865155695205239 |
| 0.0226210658497765 | 0.2844250420229553 | 0.4870892406531191 |
| 0.2975739400831651 | 0.7752864203862101 | 0.4841000266089022 |
| 0.2216478394178958 | 0.0042903464968005 | 0.4848633868126873 |
| 0.9924094313556654 | 0.6989580386495449 | 0.4840231236440546 |
| 0.5261528846090040 | 0.0908906570795214 | 0.4864961289352870 |
| 0.9057628770116021 | 0.9170474436353161 | 0.4859021303390559 |
| 0.0797838625836750 | 0.4705297888092258 | 0.4860735603023364 |
| 0.4798877593286129 | 0.9116832331740052 | 0.4849808800808763 |
| 0.0853242160096024 | 0.0499892484993188 | 0.4856003064783372 |
| 0.9468336289274052 | 0.5169262667925145 | 0.4849821139247052 |
| 0.4526108670681371 | 0.3597197164992341 | 0.7259449648833557 |
| 0.5524809739862417 | 0.5586436491734620 | 0.7189267754374584 |
| 0.2729644725094007 | 0.2775027245532211 | 0.6931110731732679 |
| 0.7739688505555180 | 0.3925195566129732 | 0.4883046603624485 |
| 0.6039328334483082 | 0.8629292561647757 | 0.4877248935150784 |
| 0.1339220853763644 | 0.2227257697859386 | 0.4890296239313862 |
| 0.2512676375272271 | 0.6048088853835032 | 0.4872519004369210 |
| 0.3923291784263305 | 0.1283121829855392 | 0.4883810072852850 |
| 0.8682509781962112 | 0.7455105598584599 | 0.4869472872519909 |
| 0.8372731192701978 | 0.1595005279827551 | 0.4852556873663875 |

|                    |                    |                    |
|--------------------|--------------------|--------------------|
| 0.1706752398652557 | 0.8262548606102140 | 0.4819695373743125 |
| 0.1974488940408603 | 0.0907320421850936 | 0.6939927263462857 |
| 0.4683108852528473 | 0.6163991843947023 | 0.5156423948921377 |
| 0.3801416238324823 | 0.3331153258824250 | 0.5176421146021170 |
| 0.6632673685653387 | 0.5282400434258933 | 0.5158429324353129 |

C<sub>1</sub> path

\*CHO+2\*CO

C15Cu3H1N8O3

|                     |                    |                     |
|---------------------|--------------------|---------------------|
| 1.0000000000000000  |                    |                     |
| 8.8479003899999995  | 0.0000000000000000 | 0.0000000000000000  |
| -4.4239634600000004 | 7.6624988500000004 | 0.0000000000000000  |
| 0.0000000000000000  | 0.0000000000000000 | 19.5596008300000008 |

|   |    |   |   |    |
|---|----|---|---|----|
| H | C  | N | O | Cu |
| 1 | 15 | 8 | 3 | 3  |

Direct

|                    |                    |                    |
|--------------------|--------------------|--------------------|
| 0.2170809312635618 | 0.4947266570242103 | 0.6101785727272924 |
| 0.6985608778709052 | 0.2397687205578511 | 0.4914051405632617 |
| 0.7637409081866803 | 0.9941120269047026 | 0.4889046705592573 |
| 0.0092080234996881 | 0.3052203971999239 | 0.4895896226691355 |
| 0.2830315401126547 | 0.7934428295362062 | 0.4835073977243661 |
| 0.2111769541538902 | 0.0284572069804227 | 0.4884446528529328 |
| 0.9763312323162229 | 0.7201051907750925 | 0.4861559746090453 |
| 0.5123589932403148 | 0.1085687604189434 | 0.4908672374802490 |
| 0.8948126678779335 | 0.9405429813204957 | 0.4892805875097406 |
| 0.0628011858744468 | 0.4905452826492021 | 0.4863101884203382 |
| 0.4665329097349609 | 0.9285150744495650 | 0.4862303697293603 |
| 0.0758144374868582 | 0.0756120842707125 | 0.4894021876424747 |
| 0.9290657293400637 | 0.5369744645424146 | 0.4874254289335124 |
| 0.2885482332749825 | 0.1990840797027670 | 0.6411686912059952 |
| 0.7351256437614919 | 0.5609446416644217 | 0.6433167175958777 |
| 0.3617394181494048 | 0.5439041041974048 | 0.6117541318725260 |
| 0.7557119634577218 | 0.4118038986250079 | 0.4935282953581011 |
| 0.5905814521538199 | 0.8780779625212484 | 0.4882440192730280 |
| 0.1242718302341977 | 0.2489252739206070 | 0.4928820756043244 |
| 0.2354611056490710 | 0.6229037501730715 | 0.4844172888523127 |
| 0.3818685448513862 | 0.1505130187242651 | 0.4948184711265102 |
| 0.8538857611096807 | 0.7680146664278784 | 0.4915864036560537 |
| 0.8226278617558584 | 0.1791308019807645 | 0.4882988749693702 |
| 0.1572647312264331 | 0.8477188780069271 | 0.4825506409704913 |
| 0.2737732873304649 | 0.1427049021327325 | 0.6954128124583058 |
| 0.7608856901856530 | 0.5477566337149040 | 0.7002017624419198 |
| 0.4447278489940780 | 0.6292685342243427 | 0.6614943288204439 |
| 0.4554684466365276 | 0.6238356761454489 | 0.5182725443782024 |

|                    |                    |                    |
|--------------------|--------------------|--------------------|
| 0.3606355585954256 | 0.3339158899653422 | 0.5607996715995933 |
| 0.6787101016756200 | 0.5582201212431180 | 0.5529337483960095 |

\*COH+2\*CO

C15Cu3H1N8O3

|                     |                    |                    |
|---------------------|--------------------|--------------------|
| 1.0000000000000000  |                    |                    |
| 8.8478999999999992  | 0.0000000000000000 | 0.0000000000000000 |
| -4.4239633700000001 | 7.6624984500000002 | 0.0000000000000000 |
| 0.0000000000000000  | 0.0000000000000000 | 19.559599999999997 |

|   |    |   |   |    |
|---|----|---|---|----|
| H | C  | N | O | Cu |
| 1 | 15 | 8 | 3 | 3  |

Direct

|                    |                    |                    |
|--------------------|--------------------|--------------------|
| 0.8099178728028263 | 0.7568962747512696 | 0.7261564373399712 |
| 0.1919632648941395 | 0.7111926298482458 | 0.4871481258754823 |
| 0.2574086902534916 | 0.4658734726395007 | 0.4875592445280594 |
| 0.5032974188579040 | 0.7767664123953931 | 0.4863014176347286 |
| 0.7779090484073289 | 0.2636642158173959 | 0.4834735693768147 |
| 0.7043061764429912 | 0.4973660667827232 | 0.4818357966277002 |
| 0.4696956246974698 | 0.1904254710749544 | 0.4834958731183069 |
| 0.0070150197228127 | 0.5800614521542123 | 0.4853228740244859 |
| 0.3885036854100539 | 0.4106076687820928 | 0.4861852730737884 |
| 0.5574765112477483 | 0.9617528231090755 | 0.4859965647607815 |
| 0.9605538194280336 | 0.3995009743410569 | 0.4849727719277910 |
| 0.5685997777595100 | 0.5451149867489345 | 0.4833505464219727 |
| 0.4228372863232026 | 0.0081434914819547 | 0.4850904663876017 |
| 0.8232575511214453 | 0.7759503967895937 | 0.6301068611648066 |
| 0.2411994118112814 | 0.0571625594089842 | 0.6392021182125066 |
| 0.9371946926078680 | 0.1882178552908657 | 0.6391903367255650 |
| 0.2491447798319595 | 0.8833211204115747 | 0.4898593017854638 |
| 0.0854612221711694 | 0.3504827826415067 | 0.4899828399675503 |
| 0.6184370022378927 | 0.7189571128139735 | 0.4868415122153059 |
| 0.7300275553100870 | 0.0932812509247001 | 0.4888753334871277 |
| 0.8749000104176129 | 0.6211616775430339 | 0.4860850569661749 |
| 0.3468843778131873 | 0.2383806758261960 | 0.4889317398913173 |
| 0.3178271829154434 | 0.6507391938951286 | 0.4850424761859929 |
| 0.6507023915921404 | 0.3176627677598479 | 0.4788530999460039 |
| 0.8756254442623067 | 0.8430009172567642 | 0.6901580824952698 |
| 0.2516180903353274 | 0.0686843754402810 | 0.6982725493598753 |
| 0.9454585297257102 | 0.2029216634389676 | 0.6981979842907007 |
| 0.9389208544947442 | 0.1214439108003157 | 0.5501713996935359 |
| 0.8505750480663767 | 0.8087536135493785 | 0.5399902303055207 |
| 0.1656833490379726 | 0.0267115162821073 | 0.5498318362098020 |

\*CHOH+2\*CO

C15Cu3H2N8O3

1.0000000000000000

|                     |                    |                     |
|---------------------|--------------------|---------------------|
| 8.8479003899999995  | 0.0000000000000000 | 0.0000000000000000  |
| -4.4239634600000004 | 7.6624988500000004 | 0.0000000000000000  |
| 0.0000000000000000  | 0.0000000000000000 | 19.5596008300000008 |

|   |    |   |   |    |
|---|----|---|---|----|
| H | C  | N | O | Cu |
| 2 | 15 | 8 | 3 | 3  |

Direct

|                    |                    |                    |
|--------------------|--------------------|--------------------|
| 0.2186740210462574 | 0.4743874284554536 | 0.6121792181947734 |
| 0.3576724026376241 | 0.5564685668084279 | 0.7066430637316812 |
| 0.6968355929280523 | 0.2406239721032580 | 0.4899346830099503 |
| 0.7627849754523073 | 0.9954678604641195 | 0.4882834479980356 |
| 0.0080697158446725 | 0.3061623176491394 | 0.4876456013889310 |
| 0.2822990046793002 | 0.7942875999079940 | 0.4817441035377011 |
| 0.2095526808514321 | 0.0284626464482148 | 0.4855789543349806 |
| 0.9754185576174766 | 0.7209113330099638 | 0.4852216921511475 |
| 0.5118201934333176 | 0.1096567019739985 | 0.4886427825557300 |
| 0.8934790287975093 | 0.9410710812289950 | 0.4882861062120355 |
| 0.0618698403066420 | 0.4913936248743576 | 0.4849900504116695 |
| 0.4647677271869701 | 0.9294053184967156 | 0.4846888577511562 |
| 0.0741124866793608 | 0.0760728625207383 | 0.4868393581878538 |
| 0.9280279476231841 | 0.5380828672791040 | 0.4862804045191143 |
| 0.2826051574027101 | 0.1812803865985834 | 0.6393646641449342 |
| 0.7410209067249185 | 0.5577709296601621 | 0.6434055423807137 |
| 0.3586142431697008 | 0.5144891690590163 | 0.6088180797209972 |
| 0.7543462570240541 | 0.4132223773057728 | 0.4924557542742202 |
| 0.5896161906375583 | 0.8788674356317032 | 0.4888052182013226 |
| 0.1232229537066266 | 0.2493199169236007 | 0.4898851707317363 |
| 0.2347880825460976 | 0.6237668859438660 | 0.4836846835126998 |
| 0.3802384734426759 | 0.1510861531928137 | 0.4919669548824308 |
| 0.8522386613897134 | 0.7685659593565271 | 0.4914805788423263 |
| 0.8216297815376992 | 0.1799675905619081 | 0.4869437155953832 |
| 0.1555555281379338 | 0.8485903784030833 | 0.4807010604849158 |
| 0.2873774748715233 | 0.1821849240460230 | 0.6987593331538118 |
| 0.7727062397918636 | 0.5431474178673033 | 0.6994408304626802 |
| 0.4427183086315802 | 0.5783843646588613 | 0.6707268643521075 |
| 0.4578824195315252 | 0.6383611868814645 | 0.5260438155318973 |
| 0.3613756627088448 | 0.3262363272952988 | 0.5562241772548973 |
| 0.6812640336608854 | 0.5608284153935567 | 0.5538535124881662 |

CH<sub>2</sub>O+2\*CO

C15Cu3H2N8O3

1.0000000000000000

|                    |                    |                    |
|--------------------|--------------------|--------------------|
| 8.8479003899999995 | 0.0000000000000000 | 0.0000000000000000 |
|--------------------|--------------------|--------------------|

|                     |                    |                     |
|---------------------|--------------------|---------------------|
| -4.4239634600000004 | 7.6624988500000004 | 0.0000000000000000  |
| 0.0000000000000000  | 0.0000000000000000 | 19.5596008300000008 |

|   |    |   |   |    |
|---|----|---|---|----|
| H | C  | N | O | Cu |
| 2 | 15 | 8 | 3 | 3  |

Direct

|                    |                    |                    |
|--------------------|--------------------|--------------------|
| 0.2873024353374944 | 0.6065569566417729 | 0.6477863734432117 |
| 0.4967587915078799 | 0.6476555939472456 | 0.6895445551500372 |
| 0.6994098523382598 | 0.2080692505110728 | 0.4878841390472419 |
| 0.7637057908526651 | 0.9627612484291678 | 0.4842951082045918 |
| 0.0089954573662734 | 0.2725292859482247 | 0.4856649512119336 |
| 0.2833126010112307 | 0.7603151842428961 | 0.4815183392843526 |
| 0.2119200862021352 | 0.9953301341121372 | 0.4843739285117544 |
| 0.9763156339022598 | 0.6884434733481506 | 0.4827323637588663 |
| 0.5122550056980829 | 0.0753797320065882 | 0.4870963671608338 |
| 0.8960509829087827 | 0.9086129738963964 | 0.4841581244053645 |
| 0.0627694595773313 | 0.4587369198035198 | 0.4838544777290226 |
| 0.4676410999748604 | 0.8967313973005244 | 0.4828584560217871 |
| 0.0757472006774529 | 0.0432327413365114 | 0.4841886392566729 |
| 0.9289881621321563 | 0.5042065809155365 | 0.4845085867039360 |
| 0.3035494031727619 | 0.2475922856991702 | 0.6415729463202002 |
| 0.7425977636127709 | 0.5446145332262781 | 0.6399660057048219 |
| 0.4250813367353900 | 0.7022217754686627 | 0.6617664330093228 |
| 0.7555816444725836 | 0.3794962919378757 | 0.4893618555711273 |
| 0.5918351113503647 | 0.8470139263059336 | 0.4829462213318313 |
| 0.1241472415863988 | 0.2163203982949086 | 0.4867722633640966 |
| 0.2361103260277319 | 0.5901231638506025 | 0.4829214533912610 |
| 0.3819826865548644 | 0.1173261021344077 | 0.4897488956619100 |
| 0.8544099762861158 | 0.7364636987764516 | 0.4856909036363889 |
| 0.8230744038429629 | 0.1472158919852145 | 0.4857028800585106 |
| 0.1575720028235081 | 0.8148319162014042 | 0.4806742930227605 |
| 0.3070163728951962 | 0.2624852547028889 | 0.7006082606861606 |
| 0.7431003319896027 | 0.5453265176816747 | 0.6993129608457646 |
| 0.4902820259021216 | 0.8577779615021145 | 0.6492749861075038 |
| 0.4576416410662513 | 0.5866222405812090 | 0.5071776596335119 |
| 0.3564093269734700 | 0.3017812712689234 | 0.5509525393064133 |
| 0.6711098352211001 | 0.5254311479425493 | 0.5507846724588147 |

\*CH<sub>2</sub>OH+2\*CO

C15Cu3H3N8O3

|                     |                    |                     |
|---------------------|--------------------|---------------------|
| 1.0000000000000000  |                    |                     |
| 8.8479003899999995  | 0.0000000000000000 | 0.0000000000000000  |
| -4.4239634600000004 | 7.6624988500000004 | 0.0000000000000000  |
| 0.0000000000000000  | 0.0000000000000000 | 19.5596008300000008 |
| H                   | C                  | N                   |
|                     | O                  | Cu                  |

3 15 8 3 3

Direct

|                    |                    |                    |
|--------------------|--------------------|--------------------|
| 0.2087259675055732 | 0.4701335704318668 | 0.6207869741586182 |
| 0.3931903319815559 | 0.4829863716566598 | 0.7057307438214712 |
| 0.3584074329414462 | 0.6977300553361780 | 0.6084461165911924 |
| 0.6979440349322836 | 0.2402929595510571 | 0.4888595410230285 |
| 0.7638066344589486 | 0.9948222672752736 | 0.4868261801467866 |
| 0.0086188224540918 | 0.3055049117083851 | 0.4870146881292053 |
| 0.2833599696110934 | 0.7935061739768489 | 0.4808208655653191 |
| 0.2114601165460404 | 0.0292406218948748 | 0.4851109329381431 |
| 0.9765772200133858 | 0.7211936641872364 | 0.4842126141129829 |
| 0.5126205406737295 | 0.1092966106208278 | 0.4876467138780917 |
| 0.8951399097178204 | 0.9413373712945636 | 0.4871128779613698 |
| 0.0629467683924008 | 0.4917453362836842 | 0.4838833871853529 |
| 0.4662523067280204 | 0.9285222329159504 | 0.4836462192666775 |
| 0.0757176194221186 | 0.0759371854851233 | 0.4865317856886206 |
| 0.9286102347182141 | 0.5373380329120452 | 0.4853872051490994 |
| 0.2963977065223309 | 0.2031673362809687 | 0.6375213642131304 |
| 0.7337635237417702 | 0.5576154577007678 | 0.6424811623233314 |
| 0.3481104354575467 | 0.5703376152215635 | 0.6203011154589884 |
| 0.7554422576692635 | 0.4129564982217708 | 0.4915726863053023 |
| 0.5911437811273362 | 0.8787568063300280 | 0.4867870459957827 |
| 0.1240511869711859 | 0.2496002484245526 | 0.4903924893768410 |
| 0.2351297630356884 | 0.6225555570848349 | 0.4821050986881523 |
| 0.3819553181660939 | 0.1512594402842443 | 0.4907823484020644 |
| 0.8538982921762427 | 0.7685091247572668 | 0.4898848840985998 |
| 0.8231505501290759 | 0.1803827916893509 | 0.4857335046050306 |
| 0.1567415718231063 | 0.8478152222256889 | 0.4798218106018777 |
| 0.2993419832959064 | 0.1552898791944291 | 0.6923592485937675 |
| 0.7441869131385742 | 0.5392092182829401 | 0.7005230560208061 |
| 0.4283672218011567 | 0.5953236444789446 | 0.6843824903112782 |
| 0.4573126156441487 | 0.6316026416711896 | 0.5255743335729868 |
| 0.3531425867228824 | 0.3332109530542122 | 0.5570092778575483 |
| 0.6790683724809971 | 0.5581219895666619 | 0.5525524079585648 |

\*CH+2\*CO

C15Cu3H1N8O2

|                     |                    |                     |
|---------------------|--------------------|---------------------|
| 1.0000000000000000  |                    |                     |
| 8.8479003899999995  | 0.0000000000000000 | 0.0000000000000000  |
| -4.4239634600000004 | 7.6624988500000004 | 0.0000000000000000  |
| 0.0000000000000000  | 0.0000000000000000 | 19.5596008300000008 |

H C N O Cu  
1 15 8 2 3

Direct

|                    |                    |                    |
|--------------------|--------------------|--------------------|
| 0.4604128880771430 | 0.5548135399081202 | 0.6571106503741733 |
| 0.6821345758945027 | 0.2349955396895989 | 0.4885222761999894 |
| 0.7473268717939544 | 0.9897395101257415 | 0.4845085431005849 |
| 0.9936800773334651 | 0.3001882976004729 | 0.4856515118137957 |
| 0.2679164301252520 | 0.7894971367608926 | 0.4801825522770723 |
| 0.1941271921910571 | 0.0218413648479264 | 0.4840251632060534 |
| 0.9596006961406092 | 0.7154224711579763 | 0.4824623681232576 |
| 0.4974132470865092 | 0.1046929907394142 | 0.4868352488266453 |
| 0.8788835530381321 | 0.9347827471695082 | 0.4843370661115696 |
| 0.0482646450319122 | 0.4862535155216771 | 0.4834872436107145 |
| 0.4500832947042869 | 0.9247453686829232 | 0.4821401187799668 |
| 0.0584467483364170 | 0.0701375331838494 | 0.4846373623498955 |
| 0.9142354670265908 | 0.5325810871157999 | 0.4849439514936865 |
| 0.2426181607207438 | 0.1870113932089844 | 0.6399648795992258 |
| 0.7917116514861882 | 0.5889202247123090 | 0.6407694745346916 |
| 0.4676281481860841 | 0.5338461304054777 | 0.6023012110888055 |
| 0.7412238451329338 | 0.4078938652371491 | 0.4924046908567090 |
| 0.5744921635478107 | 0.8741513823896709 | 0.4848585014875809 |
| 0.1086353104524842 | 0.2438284315599570 | 0.4877042810841096 |
| 0.2213579888258768 | 0.6186393071361223 | 0.4833153811292211 |
| 0.3642854426501531 | 0.1442474005039522 | 0.4909316995102583 |
| 0.8362801415261317 | 0.7622048208094447 | 0.4861238533765298 |
| 0.8075731328530504 | 0.1744957843185411 | 0.4848148699066346 |
| 0.1398559376808202 | 0.8423288626014028 | 0.4786317059573031 |
| 0.2392075433680242 | 0.1564674653758754 | 0.6976795255835166 |
| 0.8116498773444890 | 0.5905534083404859 | 0.6993159686056789 |
| 0.4344671829181019 | 0.6347293085958781 | 0.5267440008367347 |
| 0.3479070309547265 | 0.3116340553426925 | 0.5586475435899692 |
| 0.6607745955725794 | 0.5330281469580728 | 0.5590966865855964 |

\*CH<sub>2</sub>+2\*CO

C15Cu3H2N8O2

1.0000000000000000

8.8479003899999995 0.0000000000000000 0.0000000000000000

-4.4239634600000004 7.6624988500000004 0.0000000000000000

0.0000000000000000 0.0000000000000000 19.5596008300000008

H C N O Cu

2 15 8 2 3

Direct

|                    |                     |                    |
|--------------------|---------------------|--------------------|
| 0.2345519319973730 | 0.4865231092502821  | 0.6127504081694969 |
| 0.4423306390735364 | 0.5680830198714886  | 0.6551081488014262 |
| 0.6902158401274363 | 0.2444340673926758  | 0.4872911968962422 |
| 0.7557026038829195 | -0.0006056574513444 | 0.4844465349006853 |
| 0.0010553100153220 | 0.3092992669349195  | 0.4841300199851286 |

|                    |                    |                    |
|--------------------|--------------------|--------------------|
| 0.2748778312138386 | 0.7975252588586826 | 0.4784344964769505 |
| 0.2024678689159975 | 0.0319196602711771 | 0.4827994720509526 |
| 0.9683018593502036 | 0.7248161582273803 | 0.4827422249138227 |
| 0.5045060355982716 | 0.1127942217769136 | 0.4857441421051831 |
| 0.8868187631728421 | 0.9449079319326859 | 0.4850469249291735 |
| 0.0549950107383919 | 0.4955409058218271 | 0.4819552562111692 |
| 0.4577780033593017 | 0.9331724197075333 | 0.4808888048444601 |
| 0.0669621809377707 | 0.0798242691230834 | 0.4836885355613378 |
| 0.9206658275724440 | 0.5411693485378724 | 0.4839367820133043 |
| 0.2870237724673675 | 0.1842498305155753 | 0.6395296551398076 |
| 0.7301876222157384 | 0.5635351665611787 | 0.6429118556680047 |
| 0.3729596308039699 | 0.5230795067787277 | 0.6064818227590474 |
| 0.7472937474178016 | 0.4168349460090220 | 0.4902405462257500 |
| 0.5828084232104983 | 0.8825796115850835 | 0.4845658567206146 |
| 0.1158333433032806 | 0.2529280852587313 | 0.4858432819908403 |
| 0.2278565303290228 | 0.6273907491644617 | 0.4803321117316443 |
| 0.3731643667027859 | 0.1542991357690199 | 0.4895717747515868 |
| 0.8450857323358417 | 0.7722530477112202 | 0.4886808076227306 |
| 0.8147142709957478 | 0.1839718652932832 | 0.4838395574783056 |
| 0.1479386946032883 | 0.8518140689713330 | 0.4781769400985810 |
| 0.3082933038688378 | 0.1765842880464116 | 0.6976521444760537 |
| 0.7367956896060649 | 0.5499491670393799 | 0.7014135691559998 |
| 0.4548588924877768 | 0.6455376011796428 | 0.5234658726335960 |
| 0.3587013522538931 | 0.3266222696337474 | 0.5565970743783204 |
| 0.6724808614424453 | 0.5666026202280319 | 0.5528595113097887 |

\*CH<sub>3</sub>OH+2\*CO

C<sub>15</sub>Cu<sub>3</sub>H<sub>4</sub>N<sub>8</sub>O<sub>3</sub>

1.0000000000000000

8.8479003899999995 0.0000000000000000 0.0000000000000000

-4.4239634600000004 7.6624988500000004 0.0000000000000000

0.0000000000000000 0.0000000000000000 19.5596008300000008

H C N O Cu

4 15 8 3 3

Direct

|                    |                    |                    |
|--------------------|--------------------|--------------------|
| 0.2109302851112811 | 0.5473369739635668 | 0.6564697246042666 |
| 0.4055026827667570 | 0.5528390475119561 | 0.7409656870266671 |
| 0.2672256592739558 | 0.7586057802584492 | 0.6885049027303154 |
| 0.4275881552209895 | 0.7272625875965129 | 0.6448763222355307 |
| 0.7083770019626542 | 0.2169982110031789 | 0.4791187162796662 |
| 0.7733371533464675 | 0.9716527980596740 | 0.4754095410442060 |
| 0.0182718724403187 | 0.2812990051057115 | 0.4765782388177660 |
| 0.2932148700375609 | 0.7693412822947300 | 0.4729989347045486 |
| 0.2212270586080378 | 0.0039783281501138 | 0.4754277272428805 |

|                    |                    |                    |
|--------------------|--------------------|--------------------|
| 0.9862382122573298 | 0.6973171549566815 | 0.4742942915621069 |
| 0.5220099687115572 | 0.0848451989970402 | 0.4783526415675185 |
| 0.9052867568115471 | 0.9171265072045069 | 0.4753544568693655 |
| 0.0726518920789723 | 0.4676122791421368 | 0.4750258568521280 |
| 0.4766634969911918 | 0.9055494004071070 | 0.4743722281769368 |
| 0.0848350377927415 | 0.0515688778310889 | 0.4751166243087955 |
| 0.9387943755787244 | 0.5131475211103850 | 0.4760089022834949 |
| 0.3171096173118885 | 0.2570932215547502 | 0.6306243493201746 |
| 0.7269333890558082 | 0.5607544291765364 | 0.6319273492957114 |
| 0.3156679695283231 | 0.6672406655817988 | 0.6806102952702449 |
| 0.7654456463639336 | 0.3888853039200106 | 0.4813791310101665 |
| 0.6014102264425729 | 0.8561134661214002 | 0.4746887625324359 |
| 0.1333083884090533 | 0.2247814724968506 | 0.4777368001391319 |
| 0.2455376455576927 | 0.5986002354487039 | 0.4742848930493496 |
| 0.3911198731021091 | 0.1262445926757846 | 0.4807272746746905 |
| 0.8638914338157766 | 0.7449936685003604 | 0.4773163896919184 |
| 0.8328744059485703 | 0.1563059235331201 | 0.4763330310179441 |
| 0.1667942491852526 | 0.8234718182397537 | 0.4719448504503247 |
| 0.3245797383022884 | 0.2658933857735549 | 0.6899160618173228 |
| 0.7105913783156514 | 0.5675134563864956 | 0.6905843286834090 |
| 0.3630526747683050 | 0.6346004486796792 | 0.7462173022334633 |
| 0.4673136809687023 | 0.5959949460254098 | 0.4957309432199127 |
| 0.3638116625391257 | 0.3111184036639821 | 0.5399824958762582 |
| 0.6802310213948842 | 0.5339615586289941 | 0.5401162654113244 |

\*CH<sub>3</sub>+2\*CO

C15Cu3H3N8O2

1.0000000000000000

8.8479003899999995 0.0000000000000000 0.0000000000000000

-4.4239634600000004 7.6624988500000004 0.0000000000000000

0.0000000000000000 0.0000000000000000 19.5596008300000008

| H | C  | N | O | Cu |
|---|----|---|---|----|
| 3 | 15 | 8 | 2 | 3  |

Direct

|                    |                    |                    |
|--------------------|--------------------|--------------------|
| 0.2285816295747922 | 0.4896057654391391 | 0.6222393273048917 |
| 0.4247589839373965 | 0.6952921585380060 | 0.6184041779340552 |
| 0.4255973161106147 | 0.5250242996288338 | 0.6627209147589734 |
| 0.6960746333046143 | 0.2462743440654012 | 0.4870175421576581 |
| 0.7619209513324933 | 0.0009273944468132 | 0.4844737112719045 |
| 0.0067623236847925 | 0.3114392106323727 | 0.4850715478483837 |
| 0.2815323896461378 | 0.7997582958972980 | 0.4794847483402297 |
| 0.2094474387365001 | 0.0354029603930273 | 0.4831462194767168 |
| 0.9747608886108918 | 0.7273555950364607 | 0.4819986206425343 |
| 0.5109602666938984 | 0.1155629145794267 | 0.4860454416108709 |

|                    |                    |                    |
|--------------------|--------------------|--------------------|
| 0.8930813761884409 | 0.9474487073653262 | 0.4846371911496629 |
| 0.0613126805822827 | 0.4978837097255628 | 0.4822967203043164 |
| 0.4643830880001827 | 0.9346691282808035 | 0.4818673428709887 |
| 0.0738757553014028 | 0.0821603631074544 | 0.4841402800803729 |
| 0.9269372608087146 | 0.5436066589956556 | 0.4833160788827639 |
| 0.2909629629636339 | 0.1883584385127041 | 0.6340924678314875 |
| 0.7374386861974516 | 0.5677646806715699 | 0.6406008315897977 |
| 0.3711023849479955 | 0.5515998720741307 | 0.6171256753617436 |
| 0.7536034448190558 | 0.4190399566654447 | 0.4894684921649196 |
| 0.5892064213868553 | 0.8848305450541308 | 0.4843395287720391 |
| 0.1220502063472729 | 0.2555451995380469 | 0.4878476092793381 |
| 0.2332735152168025 | 0.6289111469059466 | 0.4812193581726428 |
| 0.3800686127571680 | 0.1576034943995435 | 0.4894102778936357 |
| 0.8519680943787420 | 0.7746197579882288 | 0.4873874715091556 |
| 0.8211776230891434 | 0.1864841750014269 | 0.4839162348842105 |
| 0.1549439784410794 | 0.8540616785404972 | 0.4780140665773072 |
| 0.3004533903791952 | 0.1347010402304573 | 0.6867351036361682 |
| 0.7444624683169921 | 0.5550637955048537 | 0.6992803245516911 |
| 0.4559541322174896 | 0.6364639536587664 | 0.5205527987528279 |
| 0.3547210573247722 | 0.3382971144885872 | 0.5558234908362324 |
| 0.6793702487031822 | 0.5650731546340931 | 0.5506370235524686 |

\*CH<sub>4</sub>+2\*CO

C15Cu3H4N8O2

1.0000000000000000

8.8479003899999995 0.0000000000000000 0.0000000000000000

-4.4239634600000004 7.6624988500000004 0.0000000000000000

0.0000000000000000 0.0000000000000000 19.5596008300000008

H C N O Cu

4 15 8 2 3

Direct

|                    |                    |                    |
|--------------------|--------------------|--------------------|
| 0.1870482253881275 | 0.5104095267227188 | 0.7020201326532028 |
| 0.3264479286085452 | 0.6628595590245646 | 0.7651378665071962 |
| 0.4102469442534992 | 0.5645669800083830 | 0.7078419097518208 |
| 0.3578167799394584 | 0.7224783699230329 | 0.6766016069171804 |
| 0.6972066791945121 | 0.2231120149301133 | 0.4827850828685940 |
| 0.7620940701805956 | 0.9777750995129697 | 0.4798503821551866 |
| 0.0070511401353103 | 0.2874677912414178 | 0.4809916356724590 |
| 0.2819129048463513 | 0.7752480351158570 | 0.4772907884644256 |
| 0.2103872807068086 | 0.0104598178461226 | 0.4786567099020335 |
| 0.9748107251926219 | 0.7035316894063587 | 0.4785304230805986 |
| 0.5107467484968617 | 0.0905951026547017 | 0.4816898855386237 |
| 0.8945309277923541 | 0.9236310051750533 | 0.4796082095509455 |
| 0.0612567279004511 | 0.4738530173987592 | 0.4794444171725769 |

|                    |                    |                    |
|--------------------|--------------------|--------------------|
| 0.4655156150888697 | 0.9113124367822263 | 0.4786513923762518 |
| 0.0739759910578641 | 0.0581551621927647 | 0.4789698886183062 |
| 0.9271455210052643 | 0.5191401756074979 | 0.4800581771614849 |
| 0.3085271685051074 | 0.2305703946124352 | 0.6339323979208971 |
| 0.7330966603916187 | 0.5605851902351520 | 0.6360842653920740 |
| 0.3203653636545970 | 0.6151388584983307 | 0.7129376173893788 |
| 0.7538386771901010 | 0.3948904141356188 | 0.4846119672170028 |
| 0.5902679843854205 | 0.8617610798136331 | 0.4792656645751606 |
| 0.1224215725171292 | 0.2313621571211169 | 0.4819584195071392 |
| 0.2342817726050133 | 0.6045857449875262 | 0.4787932975584379 |
| 0.3803717736951286 | 0.1325973572598784 | 0.4829047398405797 |
| 0.8526812788762893 | 0.7513769236231856 | 0.4815565062001806 |
| 0.8216750925121205 | 0.1623720583335609 | 0.4808574036327218 |
| 0.1555204853836726 | 0.8294901138723225 | 0.4761693665832885 |
| 0.3219939718294137 | 0.2103253138585378 | 0.6917156938510260 |
| 0.7294231840920680 | 0.5627771992226640 | 0.6953869249345400 |
| 0.4558873543870611 | 0.6007082464297224 | 0.5014905044212469 |
| 0.3525796723748298 | 0.3162179325016533 | 0.5462855405914292 |
| 0.6688940878129320 | 0.5399428419521457 | 0.5459603319939942 |

C<sub>2</sub> path

\*COCHO+\*CO

C15Cu3H1N8O3

1.0000000000000000

8.8479003899999995 0.0000000000000000 0.0000000000000000

-4.4239634600000004 7.6624988500000004 0.0000000000000000

0.0000000000000000 0.0000000000000000 19.5596008300000008

H C N O Cu

1 15 8 3 3

Direct

|                    |                    |                    |
|--------------------|--------------------|--------------------|
| 0.2763933076759690 | 0.5392235245310445 | 0.6484145064107446 |
| 0.6952428323529330 | 0.2291244699370783 | 0.4928696073880088 |
| 0.7603841894358365 | 0.9848019541634536 | 0.4901431717383448 |
| 0.0064696659842379 | 0.2953901363369089 | 0.4932060173233269 |
| 0.2810440474834324 | 0.7849907964934586 | 0.4873357575647255 |
| 0.2083288495145577 | 0.0178928941491775 | 0.4900884647473044 |
| 0.9743926646516429 | 0.7106726146887946 | 0.4876514192457281 |
| 0.5099202360651196 | 0.0995419125817876 | 0.4921613683642140 |
| 0.8919476203580420 | 0.9299929329420935 | 0.4896350597941833 |
| 0.0604402063626272 | 0.4804884044760503 | 0.4907881671558700 |
| 0.4633681113756535 | 0.9197137249440500 | 0.4883995113289760 |
| 0.0721210060927402 | 0.0651116729167855 | 0.4913462875121740 |
| 0.9275480948659537 | 0.5275029767287415 | 0.4899304634089228 |
| 0.2794507665293983 | 0.2065941503487836 | 0.6455580371303682 |

|                    |                    |                    |
|--------------------|--------------------|--------------------|
| 0.5414007631206659 | 0.5892243649626158 | 0.6135477178894670 |
| 0.4154238773416265 | 0.6462541118724837 | 0.6431258072494269 |
| 0.7544552384567722 | 0.4022759052827422 | 0.4946025247594702 |
| 0.5880593810257745 | 0.8703283122504735 | 0.4895075334685856 |
| 0.1210997254604492 | 0.2380441837593156 | 0.4967018938910247 |
| 0.2327000634398700 | 0.6134555980441823 | 0.4906939742269494 |
| 0.3781503007680578 | 0.1400004855569296 | 0.4957698311787667 |
| 0.8514711207068103 | 0.7580634348112026 | 0.4899415707974963 |
| 0.8204668227133427 | 0.1693567205195509 | 0.4905858720184551 |
| 0.1543563446067762 | 0.8379294374797147 | 0.4852318606846713 |
| 0.2534228507738001 | 0.1470561702292433 | 0.6996084109484526 |
| 0.6724899261796928 | 0.6170575889758960 | 0.6465339794429605 |
| 0.4634745289738493 | 0.7974922413234554 | 0.6591190516801133 |
| 0.4423000837115597 | 0.6149980227604598 | 0.5211284730866420 |
| 0.3507771827558365 | 0.3174377358901143 | 0.5620236377139005 |
| 0.6428524112169581 | 0.5287992810434248 | 0.5283793418507093 |

\*COHCHO+\*CO

C15Cu3H2N8O3

1.0000000000000000

8.8479003899999995 0.0000000000000000 0.0000000000000000

-4.4239634600000004 7.6624988500000004 0.0000000000000000

0.0000000000000000 0.0000000000000000 19.5596008300000008

| H | C  | N | O | Cu |
|---|----|---|---|----|
| 2 | 15 | 8 | 3 | 3  |

Direct

|                    |                    |                    |
|--------------------|--------------------|--------------------|
| 0.2606837659121575 | 0.5481874742710812 | 0.6405716568248827 |
| 0.6577635773752188 | 0.6807703233202396 | 0.6850326509389092 |
| 0.7017294201706525 | 0.2382274986223788 | 0.4903250663298512 |
| 0.7665717238913247 | 0.9939426669699882 | 0.4873346482454270 |
| 0.0125717169250253 | 0.3039691541396032 | 0.4918010544370439 |
| 0.2867745939368606 | 0.7942431937312817 | 0.4851577533198860 |
| 0.2140307629647297 | 0.0272270470133694 | 0.4889280487151788 |
| 0.9803702939596528 | 0.7199137541465986 | 0.4847955508772653 |
| 0.5161904135131180 | 0.1087341332390558 | 0.4902338392225081 |
| 0.8978530014248116 | 0.9391963520506724 | 0.4869100123890443 |
| 0.0669184639869929 | 0.4900872485056015 | 0.4889927082060826 |
| 0.4693703765882510 | 0.9290936686554341 | 0.4856755955113337 |
| 0.0780763494517070 | 0.0741404704693445 | 0.4902633456391323 |
| 0.9336673897574174 | 0.5362877152098919 | 0.4871344263683480 |
| 0.2674461621452622 | 0.1948851620709054 | 0.6460289703374518 |
| 0.5114136679383774 | 0.5642161265157236 | 0.6106122893822326 |
| 0.3991781100684719 | 0.6002826659296714 | 0.6547695207431845 |
| 0.7607590112776097 | 0.4113562550918974 | 0.4911331537147467 |

|                    |                    |                    |
|--------------------|--------------------|--------------------|
| 0.5941160901430649 | 0.8792730428689521 | 0.4864483708012508 |
| 0.1271368748231809 | 0.2473775306550488 | 0.4957894064277031 |
| 0.2389199245633347 | 0.6227096404580502 | 0.4894059977756223 |
| 0.3846484455490907 | 0.1496143459370450 | 0.4952927473780254 |
| 0.8563454644113361 | 0.7663870052333542 | 0.4857757901436864 |
| 0.8269111628748286 | 0.1789338301582548 | 0.4887396209438870 |
| 0.1598065897552009 | 0.8470297118282999 | 0.4835771381871193 |
| 0.2384748068777329 | 0.1506235640438885 | 0.7022912217850192 |
| 0.6726267771479245 | 0.6278032298275216 | 0.6416675264318586 |
| 0.4618865536333632 | 0.6872534864559628 | 0.7084536943535431 |
| 0.4497737426992049 | 0.6339142567685793 | 0.5250404266530336 |
| 0.3691058302867428 | 0.3229660230274701 | 0.5660479939935046 |
| 0.6443887959473508 | 0.5374836727848372 | 0.5193472639232369 |

\*CCHO+\*CO

C15Cu3H1N8O2

1.0000000000000000

8.8479003899999995 0.0000000000000000 0.0000000000000000

-4.4239634600000004 7.6624988500000004 0.0000000000000000

0.0000000000000000 0.0000000000000000 19.5596008300000008

H C N O Cu

1 15 8 2 3

Direct

|                    |                    |                    |
|--------------------|--------------------|--------------------|
| 0.4525796777026130 | 0.5697923752943105 | 0.7049864483425737 |
| 0.6777357258991706 | 0.2298847517814291 | 0.4882119047805545 |
| 0.7416971177918336 | 0.9837739780248289 | 0.4870030146157192 |
| 0.9879211322282833 | 0.2945601966434688 | 0.4874857909103965 |
| 0.2630696490132658 | 0.7855959445203040 | 0.4821113201101007 |
| 0.1897235123382026 | 0.0187763429792928 | 0.4886028508130556 |
| 0.9579032923388600 | 0.7111877021610645 | 0.4830301055785556 |
| 0.4922192989173229 | 0.1001642458782955 | 0.4893284013138482 |
| 0.8734033318743049 | 0.9302339610832934 | 0.4875211844017787 |
| 0.0430619917628300 | 0.4810730467092451 | 0.4839406466096009 |
| 0.4453375233529861 | 0.9199246006585011 | 0.4844667467026629 |
| 0.0535961976273109 | 0.0657059438459841 | 0.4889915576271037 |
| 0.9110764845990054 | 0.5283842747255824 | 0.4833027199748670 |
| 0.2480787316424788 | 0.2004652350546901 | 0.6468359319586120 |
| 0.5049548220691470 | 0.5545622902230800 | 0.5978652697896708 |
| 0.5418954740190443 | 0.6438315423289556 | 0.6615566054685020 |
| 0.7371870890270616 | 0.4032280455633035 | 0.4882493212168763 |
| 0.5689501825983729 | 0.8691792141739265 | 0.4863037018343822 |
| 0.1026179983676914 | 0.2388435778500881 | 0.4908330983820482 |
| 0.2146486835351308 | 0.6138652765034766 | 0.4842644032613563 |
| 0.3605944953135647 | 0.1407896587198670 | 0.4959225197794710 |

|                    |                    |                    |
|--------------------|--------------------|--------------------|
| 0.8335224795903168 | 0.7571209026046396 | 0.4877628218092511 |
| 0.8020931900425904 | 0.1697616242314829 | 0.4865726783348459 |
| 0.1366227843580537 | 0.8392364389667973 | 0.4811031450561611 |
| 0.1975320851102861 | 0.1444181144506833 | 0.7003855526188649 |
| 0.6642286322397865 | 0.7966722416008785 | 0.6696618940803301 |
| 0.4162548340211592 | 0.6196642574794253 | 0.5252192094342281 |
| 0.3597661992769747 | 0.3147247799462760 | 0.5672837377398846 |
| 0.6391896833423842 | 0.5363375959968314 | 0.5286927474547369 |

\*CHCHO+\*CO

C15Cu3H2N8O2

1.0000000000000000

8.8479003899999995 0.0000000000000000 0.0000000000000000

-4.4239634600000004 7.6624988500000004 0.0000000000000000

0.0000000000000000 0.0000000000000000 19.5596008300000008

| H | C  | N | O | Cu |
|---|----|---|---|----|
| 2 | 15 | 8 | 2 | 3  |

Direct

|                    |                    |                    |
|--------------------|--------------------|--------------------|
| 0.6047031605238488 | 0.6380983474747074 | 0.7136100884566999 |
| 0.3278669557245719 | 0.5214641864399140 | 0.6547906590944135 |
| 0.6853824223095248 | 0.2265011534759340 | 0.4883598738509925 |
| 0.7496177801775893 | 0.9809150438307878 | 0.4864764577537251 |
| 0.9957880414538479 | 0.2914453417928768 | 0.4886329621594671 |
| 0.2699336113676754 | 0.7803861314072233 | 0.4844491468484031 |
| 0.1989009635750384 | 0.0159355290340266 | 0.4862807314392169 |
| 0.9637902677922208 | 0.7083423279843879 | 0.4816156880140351 |
| 0.4991287529726706 | 0.0952793010579118 | 0.4889534594152516 |
| 0.8828616912802834 | 0.9279233648847094 | 0.4846958906007069 |
| 0.0498414155247299 | 0.4781939283502332 | 0.4862979637082890 |
| 0.4534346966341108 | 0.9158660192924877 | 0.4859289242637123 |
| 0.0623640110810854 | 0.0632426174302625 | 0.4869655090859616 |
| 0.9165495471637659 | 0.5240359812477244 | 0.4837146669427778 |
| 0.2373766229992279 | 0.1546952036555292 | 0.6415312301249796 |
| 0.4374926418086575 | 0.5337247153821977 | 0.6237757773105351 |
| 0.5965487830817154 | 0.5985694951633361 | 0.6592279645338488 |
| 0.7428350937178221 | 0.3988941449258644 | 0.4884515554605846 |
| 0.5774988952888802 | 0.8649121344383789 | 0.4880804003334159 |
| 0.1109766401005067 | 0.2362720963233024 | 0.4915298075795193 |
| 0.2225773321369063 | 0.6100722089255776 | 0.4882848837824058 |
| 0.3688055661469948 | 0.1379190312776647 | 0.4931972448580245 |
| 0.8408366314107846 | 0.7553988981271279 | 0.4832654940649088 |
| 0.8097917178190305 | 0.1662287039853304 | 0.4866109809700955 |
| 0.1442562639801886 | 0.8354347577504340 | 0.4813645600771161 |
| 0.2060814011096453 | 0.1073562511974814 | 0.6974591711857421 |

|                    |                    |                    |
|--------------------|--------------------|--------------------|
| 0.7363423362244043 | 0.6154433548398096 | 0.6324086328577504 |
| 0.4336605570302631 | 0.6192173045777972 | 0.5328747183813327 |
| 0.3511478359411186 | 0.3113483124203303 | 0.5680952462295988 |
| 0.6495994836228658 | 0.5343559933066481 | 0.5338211706164951 |

\*CH<sub>2</sub>CHO+\*CO

C15Cu3H3N8O2

1.0000000000000000

|                     |                    |                     |
|---------------------|--------------------|---------------------|
| 8.8479003899999995  | 0.0000000000000000 | 0.0000000000000000  |
| -4.4239634600000004 | 7.6624988500000004 | 0.0000000000000000  |
| 0.0000000000000000  | 0.0000000000000000 | 19.5596008300000008 |

|   |    |   |   |    |
|---|----|---|---|----|
| H | C  | N | O | Cu |
| 3 | 15 | 8 | 2 | 3  |

Direct

|                    |                    |                    |
|--------------------|--------------------|--------------------|
| 0.8048006098161132 | 0.8281217421086682 | 0.6204587979614105 |
| 0.4941787579831767 | 0.6958636188781721 | 0.6293258633315562 |
| 0.4710220397083152 | 0.4968992153064024 | 0.6636269049974785 |
| 0.6551289850735270 | 0.2030120902926236 | 0.4944249179086000 |
| 0.7208708795129847 | 0.9579612925818114 | 0.4905705417159256 |
| 0.9656711332236253 | 0.2683892958486624 | 0.4949048550289186 |
| 0.2417776621457552 | 0.7573224422440261 | 0.4904063968615352 |
| 0.1684619638336121 | 0.9912282180212993 | 0.4896054221560797 |
| 0.9345400522631164 | 0.6844368832555979 | 0.4879031947425920 |
| 0.4703475232745569 | 0.0728582830612366 | 0.4932297138789173 |
| 0.8523833528998340 | 0.9041575896609354 | 0.4885193072240012 |
| 0.0204389355012460 | 0.4544688561873599 | 0.4938814079605075 |
| 0.4244008259159290 | 0.8922169321700045 | 0.4906398974749746 |
| 0.0327770410477851 | 0.0381129727706697 | 0.4904322615602381 |
| 0.8869681098622695 | 0.5007723210222839 | 0.4916932618764604 |
| 0.2455014514584623 | 0.1909789688579033 | 0.6486489632065394 |
| 0.5388947851379507 | 0.5985453770711207 | 0.6252599677187823 |
| 0.7304815362009153 | 0.6902321322072368 | 0.6388569934483427 |
| 0.7131707307028826 | 0.3764234147302922 | 0.4971775061750241 |
| 0.5489911262332678 | 0.8434429283660330 | 0.4919628505574112 |
| 0.0808193917330816 | 0.2116189924701705 | 0.4974800237646886 |
| 0.1930736744226760 | 0.5856224998150981 | 0.4961677031330357 |
| 0.3388021062361740 | 0.1135512628954115 | 0.4959169219001896 |
| 0.8117637420160826 | 0.7314231917886926 | 0.4890724886658068 |
| 0.7811906128229036 | 0.1444684666556157 | 0.4913086620142325 |
| 0.1149238363206086 | 0.8100558648991588 | 0.4855235978346878 |
| 0.2308086295443335 | 0.1471564938536234 | 0.7050043885379673 |
| 0.8065858955487886 | 0.6264954427720411 | 0.6699767464989488 |
| 0.3975260687256930 | 0.5897350477572626 | 0.5371442732891177 |
| 0.2977755195185241 | 0.2788666949685179 | 0.5614010904896688 |

0.6082547713157892 0.5046078474820287 0.5399387480863428

\*CH<sub>2</sub>CHOH+\*CO

C15Cu3H4N8O2

1.0000000000000000

8.8479003899999995 0.0000000000000000 0.0000000000000000

-4.4239634600000004 7.6624988500000004 0.0000000000000000

0.0000000000000000 0.0000000000000000 19.5596008300000008

| H | C  | N | O | Cu |
|---|----|---|---|----|
| 4 | 15 | 8 | 2 | 3  |

Direct

0.8947076695402258 0.6847807906734570 0.6338291523807817

0.6787015084568215 0.7838594475224143 0.6191441570058380

0.5197715351218241 0.6005463067421808 0.6731557014644940

0.8279355644996467 0.4566216611290891 0.6982810457432957

0.6361993978270342 0.2017512578697443 0.4956237041529822

0.7018924420412955 0.9571212073123541 0.4865292810170083

0.9465627529545156 0.2672533707519383 0.4906235460252017

0.2214210011377148 0.7546845375371362 0.4855059144656649

0.1484109872470224 0.9886948905546706 0.4885472810498592

0.9132394379182505 0.6819588037196954 0.4855466949568780

0.4499733417197267 0.0700853170625715 0.4938363545752277

0.8332018044988330 0.9026508254420219 0.4854417736350248

0.0005899119913212 0.4527062199286211 0.4886902340041216

0.4049335987843310 0.8907015345988035 0.4872162763954182

0.0136788524974240 0.0368967327028116 0.4874885373481249

0.8671047327526717 0.4993307224811778 0.4905638790084487

0.2577213939501617 0.2740899650577971 0.6436857613944307

0.6359348365142751 0.6554495705561613 0.6411413174533824

0.7610112318816504 0.6078594847027881 0.6528547628349959

0.6939253430986917 0.3743225577475521 0.5004621263275895

0.5295551106835197 0.8415532386765366 0.4857849773025810

0.0613828893413971 0.2099500876061617 0.4922645493956166

0.1739439782249257 0.5837054428799034 0.4868801164167859

0.3188267025067097 0.1107568330057846 0.4966926740112965

0.7917109641456008 0.7307465489641318 0.4864523499577577

0.7606582020100781 0.1422072039675965 0.4894460887574226

0.0954146801410273 0.8084949631876265 0.4837010442970633

0.2632302253451695 0.3010832866211645 0.7021990864347284

0.7304559685101885 0.4783021494912602 0.6987500354421889

0.3976747367931287 0.5809384345935764 0.5048092644621985

0.2882290846174692 0.2938336723049308 0.5518289160090503

0.6046151632473669 0.5108760746083786 0.5544704062745415

\*CH<sub>2</sub>CH<sub>2</sub>OH+\*CO

C15Cu3H5N8O2

1.0000000000000000

8.8479003899999995 0.0000000000000000 0.0000000000000000

-4.4239634600000004 7.6624988500000004 0.0000000000000000

0.0000000000000000 0.0000000000000000 19.5596008300000008

H C N O Cu

5 15 8 2 3

Direct

0.8179950523515800 0.8075065997987170 0.6261238314149047

0.5064658601957239 0.7148017344033512 0.6197540708735558

0.4479087438742828 0.5163069345213745 0.6606349903656584

0.8798345940508739 0.6121904234563319 0.6888708400608936

0.7145715728964576 0.7435591156030978 0.7076402166946971

0.6534289231027877 0.2014940794260342 0.4934792332225459

0.7195462690415847 0.9567318952799857 0.4887247327037400

0.9642289386463361 0.2670075655298542 0.4934295633250018

0.2402843644376918 0.7554964242354152 0.4884307241138405

0.1666942928015838 0.9892444935772039 0.4883460143030274

0.9321327495183698 0.6824715322061338 0.4877666808036126

0.4687024534833757 0.0712922372159919 0.4917010677270496

0.8508130173051268 0.9022778131161150 0.4878020983611548

0.0189417311640338 0.4528355889756906 0.4924544858869319

0.4227620886030470 0.8907586642807434 0.4883178814817298

0.0311554871392690 0.0363464430185293 0.4892128051874570

0.8848650540365072 0.4990235340135011 0.4913551386076811

0.2492916002346879 0.1945752203758083 0.6464330869334580

0.5397986295129023 0.6093708767436611 0.6234541414088296

0.7209864552881425 0.6951102769816208 0.6561823457008421

0.7112276956311395 0.3747347317119205 0.4972319694910817

0.5476846979879354 0.8423534023489671 0.4888541078607423

0.0793350891998632 0.2099508032283507 0.4957721555255291

0.1919731130391453 0.5838577611579389 0.4937001935123410

0.3370510070483689 0.1117648464185381 0.4944121536822934

0.8096712411062276 0.7297717979548878 0.4893187800545648

0.7796866024645875 0.1429258038803535 0.4899628704323697

0.1128859509561039 0.8080646596099255 0.4845047336270671

0.2412620817759896 0.1534926809439692 0.7031575925987487

0.7721663618456797 0.5638849700385127 0.6624895405778293

0.4024058347281956 0.5872005435868393 0.5291184279149724

0.2966815593399441 0.2792149633194937 0.5593400493383789

0.6057033471924640 0.4979660830411418 0.5445143262074704

\*CH<sub>3</sub>CH<sub>2</sub>OH+\*CO

C15Cu3H6N8O2

1.0000000000000000

|                     |                    |                     |
|---------------------|--------------------|---------------------|
| 8.8479003899999995  | 0.0000000000000000 | 0.0000000000000000  |
| -4.4239634600000004 | 7.6624988500000004 | 0.0000000000000000  |
| 0.0000000000000000  | 0.0000000000000000 | 19.5596008300000008 |

|   |    |   |   |    |
|---|----|---|---|----|
| H | C  | N | O | Cu |
| 6 | 15 | 8 | 2 | 3  |

Direct

|                    |                    |                     |
|--------------------|--------------------|---------------------|
| 0.8615918544686255 | 0.8528118858523016 | 0.6490665129555722  |
| 0.5316355188915893 | 0.7036236241009092 | 0.6359426497269887  |
| 0.5088069610768620 | 0.6297793079366304 | 0.7220466528717373  |
| 0.8471237877354240 | 0.5717567413195591 | 0.6572287717024451  |
| 0.8297707544641719 | 0.7562559422207745 | 0.7318268113977501  |
| 0.6132909606436481 | 0.8582734677329149 | 0.7044115661400547  |
| 0.6379923243985814 | 0.1759821975312890 | 0.4863385715204349  |
| 0.7032431256754317 | 0.9315962800289455 | 0.4805235960341230  |
| 0.9481302039235733 | 0.2413142288597963 | 0.4835457090772001  |
| 0.2233962508074921 | 0.7300341170618622 | 0.4786359917205985  |
| 0.1508079562552598 | 0.9639081918116523 | 0.4827738988894590  |
| 0.9161565029458439 | 0.6571349210252605 | 0.4809384367130877  |
| 0.4520050394134235 | 0.0452292190023438 | 0.4851984710680716  |
| 0.8349085115384450 | 0.8772805545816391 | 0.4813395127894380  |
| 0.0027017950598652 | 0.4273120800729040 | 0.4814131545905806  |
| 0.4060675053233365 | 0.8655567859305641 | 0.47975309255585435 |
| 0.0146488408014181 | 0.0113797247372757 | 0.4822679721873043  |
| 0.8688571897635921 | 0.4730873008438254 | 0.4828622224073353  |
| 0.2708616362869739 | 0.2430475014082152 | 0.6384033463307321  |
| 0.5954218230609891 | 0.7326879266126861 | 0.6863656346781376  |
| 0.7701725727613741 | 0.7410642698843896 | 0.6809053168749659  |
| 0.6962198327431840 | 0.3486067794744475 | 0.4887394120162352  |
| 0.5312951457020867 | 0.8165369853727353 | 0.4787173154932960  |
| 0.0632348922514225 | 0.1845294112995472 | 0.4853017172103254  |
| 0.1752010148161847 | 0.5585482797677946 | 0.4792954107307317  |
| 0.3208260948688378 | 0.0862405064905341 | 0.4880356882893360  |
| 0.7934142191774050 | 0.7047959446418385 | 0.4832764763087196  |
| 0.7628983210768054 | 0.1162393862979807 | 0.4830972979017844  |
| 0.0963365869932187 | 0.7833630646521714 | 0.4791984810920746  |
| 0.2907159037332274 | 0.2657470999255565 | 0.6971947320279894  |
| 0.7423357621991972 | 0.5795252398552301 | 0.6501536430288453  |
| 0.3924991310000153 | 0.5547059726527986 | 0.4973626768613452  |
| 0.2933782050408321 | 0.2732776491265539 | 0.5465040587685343  |
| 0.5992673851016496 | 0.4884565518870594 | 0.5348889180362342  |

\*CH<sub>2</sub>CH<sub>2</sub>+\*CO

C15Cu3H4N8O1

1.0000000000000000

|                     |                    |                     |
|---------------------|--------------------|---------------------|
| 8.8479003899999995  | 0.0000000000000000 | 0.0000000000000000  |
| -4.4239634600000004 | 7.6624988500000004 | 0.0000000000000000  |
| 0.0000000000000000  | 0.0000000000000000 | 19.5596008300000008 |

|   |    |   |   |    |
|---|----|---|---|----|
| H | C  | N | O | Cu |
| 4 | 15 | 8 | 1 | 3  |

Direct

|                    |                    |                    |
|--------------------|--------------------|--------------------|
| 0.8908350948523578 | 0.6953811194334070 | 0.6323141989370578 |
| 0.6559426247579543 | 0.7752601676085379 | 0.6327910611217369 |
| 0.5095269936260509 | 0.5713644112801919 | 0.6784993741456375 |
| 0.7426944422117239 | 0.4883026973668743 | 0.6769322135640751 |
| 0.6329981188131029 | 0.2072029810876822 | 0.4962502319203652 |
| 0.6983073679240018 | 0.9623977915500541 | 0.4882055096302828 |
| 0.9431250562277687 | 0.2723075631461012 | 0.4911029613451358 |
| 0.2178486918398047 | 0.7595047705539257 | 0.4864363883048027 |
| 0.1454689973178932 | 0.9938270166143230 | 0.4888789903368554 |
| 0.9095598994257212 | 0.6873076199671335 | 0.4869838364021878 |
| 0.4465030111997143 | 0.0748789519105739 | 0.4941571634401331 |
| 0.8302461122557516 | 0.9077530316150012 | 0.4870749400347261 |
| 0.9970851995930492 | 0.4581787229093842 | 0.4892941281973062 |
| 0.4015853010624395 | 0.8957986281979270 | 0.4884808634226626 |
| 0.0100851450520069 | 0.0422508525322213 | 0.4881101722956059 |
| 0.8634878502584020 | 0.5042988210559755 | 0.4915090911505424 |
| 0.2469200032450167 | 0.2545229102247586 | 0.6442083348952009 |
| 0.6273715317052957 | 0.6448595814704806 | 0.6481236247048895 |
| 0.7585413878960475 | 0.6018068818515612 | 0.6487841615313000 |
| 0.6903446271186332 | 0.3794238004643349 | 0.5011049115704341 |
| 0.5263876557256931 | 0.8464796242899764 | 0.4878524424740723 |
| 0.0580845782307918 | 0.2153075998706362 | 0.4921562237012905 |
| 0.1706966851544776 | 0.5890273019943378 | 0.4875541349595676 |
| 0.3155911955932730 | 0.1160038486677894 | 0.4959507580916647 |
| 0.7883086582487435 | 0.7360353088081394 | 0.4882725437074094 |
| 0.7574057734058282 | 0.1471421885649739 | 0.4906750674075889 |
| 0.0916656214051896 | 0.8136553004105559 | 0.4849217291598908 |
| 0.2578825594623093 | 0.2688254361264811 | 0.7034790767558432 |
| 0.3961704383964684 | 0.5865385193385337 | 0.5091146699620619 |
| 0.2847197514646706 | 0.2991396428429190 | 0.5531039128141625 |
| 0.6007511165298238 | 0.5127259882452103 | 0.5588077540155075 |

CH<sub>2</sub>CH<sub>2</sub>+\*CO

C15Cu3H4N8O1

1.0000000000000000

|                    |                    |                    |
|--------------------|--------------------|--------------------|
| 8.8479003899999995 | 0.0000000000000000 | 0.0000000000000000 |
|--------------------|--------------------|--------------------|

|                     |                    |                     |
|---------------------|--------------------|---------------------|
| -4.4239634600000004 | 7.6624988500000004 | 0.0000000000000000  |
| 0.0000000000000000  | 0.0000000000000000 | 19.5596008300000008 |

|   |    |   |   |    |
|---|----|---|---|----|
| H | C  | N | O | Cu |
| 4 | 15 | 8 | 1 | 3  |

Direct

|                    |                    |                    |
|--------------------|--------------------|--------------------|
| 0.9306497932151919 | 0.7567010189983605 | 0.6889633943011787 |
| 0.6630385405056128 | 0.7788684974979478 | 0.6750071431953449 |
| 0.5322673265960794 | 0.5633073394573223 | 0.7168095970953207 |
| 0.7988545879711907 | 0.5402915617839718 | 0.7305312580576649 |
| 0.6327307077743147 | 0.2002358112744586 | 0.4940324695045907 |
| 0.6970877811160169 | 0.9555611393096396 | 0.4904451399702444 |
| 0.9423784103566802 | 0.2658055131971610 | 0.4927548941958825 |
| 0.2170389620584610 | 0.7551112727959846 | 0.4882805479798786 |
| 0.1458173697750228 | 0.9896453899313988 | 0.4911979780482544 |
| 0.9110401442901646 | 0.6823583816960023 | 0.4893227967434463 |
| 0.4461908294380311 | 0.0695916384256565 | 0.4933454339860681 |
| 0.8295011339605028 | 0.9018998269203961 | 0.4906360330312947 |
| 0.9965390320956539 | 0.4521926471601798 | 0.4907614851532289 |
| 0.4005324621131816 | 0.8902857116398345 | 0.4893064329243335 |
| 0.0090912881458462 | 0.0367071105645610 | 0.4914251841686687 |
| 0.8636622379170377 | 0.4979059455026920 | 0.4907220576702053 |
| 0.2411501327966578 | 0.2347735563905995 | 0.6500043587458283 |
| 0.6594128974117492 | 0.6655134937170774 | 0.6988102339137927 |
| 0.8030206546490429 | 0.6535251551986454 | 0.7063217567623887 |
| 0.6909197920704934 | 0.3726549982008280 | 0.4949391887531686 |
| 0.5251054045701196 | 0.8405493742648167 | 0.4892340354057554 |
| 0.0576612675292615 | 0.2097492611299240 | 0.4944287791190446 |
| 0.1683946317813002 | 0.5841009010984344 | 0.4902060024346573 |
| 0.3156651907419004 | 0.1113746075284013 | 0.4958278732259409 |
| 0.7882132145153877 | 0.7294440705766150 | 0.4916538515605414 |
| 0.7570732262966245 | 0.1404675343457028 | 0.4922922650988265 |
| 0.0908350113985094 | 0.8088162017099868 | 0.4877799641795817 |
| 0.2487205898750640 | 0.2404363792829540 | 0.7093790964582192 |
| 0.3793706183038399 | 0.5799321199036954 | 0.5144189027121341 |
| 0.2873079493622239 | 0.2967047217734777 | 0.5603723346172318 |
| 0.5826480713688452 | 0.5029979087232993 | 0.5322166709872942 |
